# Supplementary material for: Structural inequities shape biodiversity and climate mitigation outcomes in livestock systems
Source: Research Square preprint supplement (doi:10.21203/rs.3.rs-8645442/v1), 2026-01-21
Supplement: Supplementary file 1 [file b2884f673501460da7eefe89.docx]

Supplementary methods

**Structural inequities shape biodiversity and climate mitigation outcomes in livestock systems**

Ganesh Bhattarai1, Karen M. Christie-Whitehead2, Karel Mokany3, Anna Drake4, Christine Chen4, Hugh Burley3, Geoff Roberts5, Natalie Doran-Browne6,7, Adam Liedloff8, Mario Herrero9, Ke Liu1, Robert Waterworth5, Rebekah Ash1, Andrew Smith10, Michelle Cain11, Lucinda J. Watt12, Courtney M. Regan13,14, Anthony O'Grady15, Pete Smith16, Daniel Mendham17, Jinfeng Chang18, Sasha Gennet19,20, Xiaogang Yin21, MD Jahangir Kabir 22 andMatthew T. Harrison1*

1Tasmanian Institute of Agriculture, University of Tasmania, Launceston, TAS 7248, Australia

2Tasmanian Institute of Agriculture, University of Tasmania, Burnie, TAS 7320, Australia

3CSIRO, Canberra, ACT 2601, Australia

4Rabobank Australia, Sydney, NSW 2000, Australia

5FLINTpro, Canberra, ACT 2601, Australia

6Agricultural Research Advisors, New Gisborne, VIC 3438, Australia

7Integrity Ag, Melbourne, VIC 3000, Australia

8CSIRO Environment, Winnellie, NT 0822, Australia

9Cornell University, Ithaca, NY, 14853, USA

10FarmSystSci Consulting, Norwood, SA 5067, Australia

11Cranfield Environment Centre, Cranfield University, Cranfield, England MK43 OAL, United Kingdom

12CSIRO Agriculture & Food, St Lucia, QLD 4067, Australia

13CSIRO Agriculture & Food, Urrbrae, SA 5064, Australia

14CSIRO Towards Net Zero Mission, Canberra, ACT 2601, Australia

15CSIRO Environment, Sandy Bay, TAS 7005, Australia

16Institute of Biological and Environmental Sciences, University of Aberdeen, Aberdeen, Scotland AB24 3UU, United Kingdom

17CSIRO Land and Water, Acton, ACT 2601, Australia

18College of Environmental and Resource Sciences, Zhejiang University, Hangzhou, 310058, China

19The Nature Conservancy, Arlington, Virginia 22203, USA

20University of California, Berkeley, California 94720, USA

21College of Agronomy and Biotechnology, China Agricultural University, Beijing 100193, China

22Strategy & Business Development Group, Grains Research and Development Corporation, Toowoomba, QLD, 4350, Australia

*Corresponding author: [matthew.harrison@utas.edu.au](mailto:matthew.harrison@utas.edu.au)

1. Case study farm locations


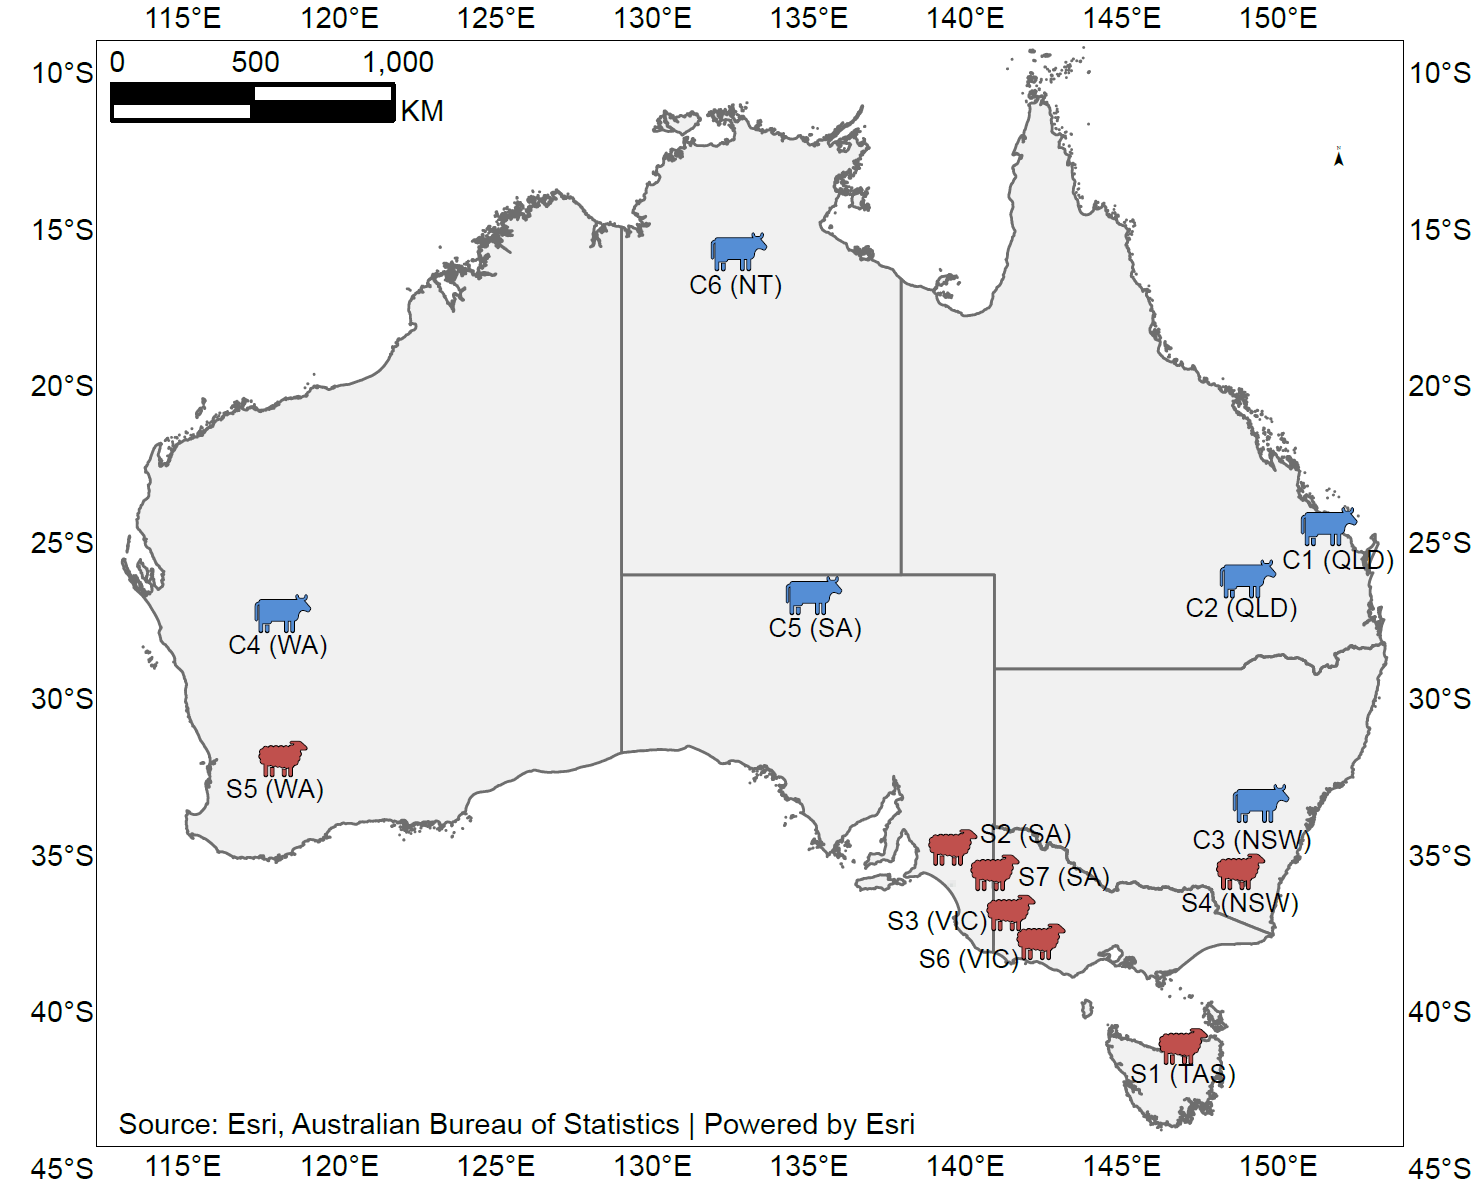


**Supplementary Methods Fig. S1. Locations of commercial livestock enterprises in this study**. C1–C6 represent beef cattle enterprises, while S1–S7 represent sheep enterprises. Collectively, these farms span Australia’s major grazing regions and agroclimatic gradients, providing spatial context for the common and farm-specific mitigation interventions evaluated across farms. State and Territory abbreviations: NSW, New South Wales; NT, Northern Territory; QLD, Queensland; SA, South Australia; TAS, Tasmania; WA, Western Australia. Further details in Supplementary Information Table S1.


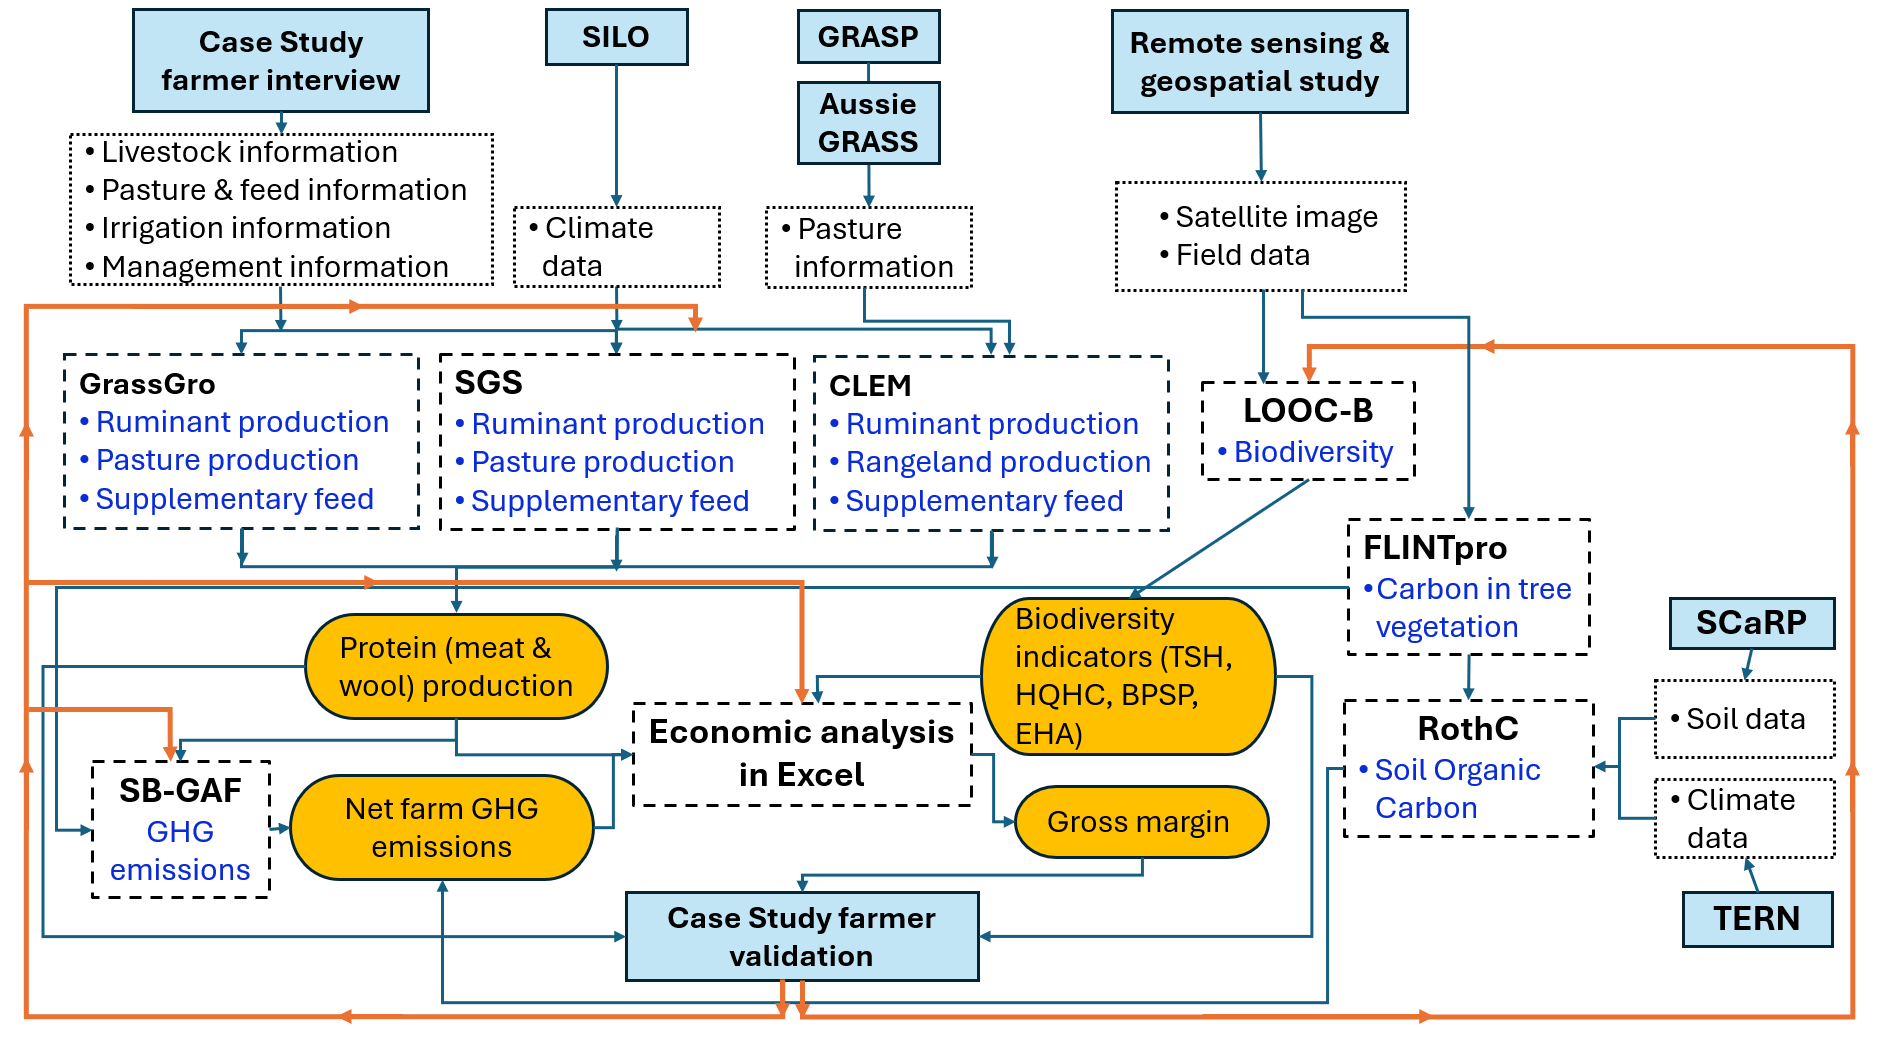


**Supplementary Methods Fig. S2. Overview of the methodological framework used to simulate baseline farm systems and assess mitigation interventions described in Table 1**. Farm-specific biophysical, economic and spatial data (light blue boxes) were compiled through participatory engagement and national datasets, and translated into model inputs (dotted boxes). Core biophysical and spatial models (dashed boxes)—including GrassGro1,2, CLEM3, SGS4, 5-7, FLINTpro8, LOOC-B9 and RothC10 —were selected according to each farm’s agroecological context. Intermediate outputs (blue text) captured livestock production, pasture growth, soil and vegetation carbon dynamics, and spatial biodiversity indicators, and were iteratively reviewed with producers (orange feedback loops) to ensure consistency with observed farm performance. Final outputs (orange ovals) included net farm greenhouse gas emissions, emissions intensity, carbon sequestration, biodiversity outcomes (EHA, HQHC, TSH and benefit for plant species persistence), and economic performance metrics. This integrated workflow enabled consistent comparison of common and farm-specific interventions across heterogeneous livestock systems while capturing trade-offs and co-benefits across climate, production, biodiversity and equity objectives. Abbreviations: AussieGRASS 11, long-term rainfall and pasture growth time series; BPSP, benefit for plant species persistence; CLEM, Crop Livestock Enterprise Model; EHA, effective habitat area; FLINTpro, spatial vegetation carbon model; GHG, greenhouse gas; GRASP, spatial pasture growth model; GrassGro, biophysical pasture and ruminant production model; HQHC, high-quality habitat condition; LOOC-B, Landscape Options and Opportunities Calculator for Biodiversity; RothC, Rothamsted soil carbon model; SB-GAF12, Sheep & Beef Greenhouse Gas Accounting Framework; SCaRP13, Soil Carbon Research Program database; SGS, Sustainable Grazing Systems model; SILO14, Australian daily climate database; TERN15, Terrestrial Ecosystem Research Network; TSH, threatened species habitat.

1. Case study farm characteristics
   1. Cattle farm 1 (C1) Maryborough, Queensland (QLD)

Farm C1 (coastal QLD) was a breeding enterprise comprising 60 breeder cows, 2 bulls, and associated young stock, totalling approximately 145 animal equivalents (AE), equivalent to 1,210 dry sheep equivalents (DSEs; based on 8.4 DSEs per AE) 16. No destocking was simulated in CLEM3 due to small herd size and relatively stable pasture availability across 390 ha of grazing land. Controlled mating occurred November–mid-May, with bulls excluded outside this period. Calves had a birth weight of 34 kg; target weaning rates of 80–95% were achieved in May and September, at approximately 4 months old (approximately 150 kg LW). Non-replacement and cast-for-age (CFA) animals were sold in May: non-replacement heifers and steers at 14–15 months; CFA cows and bulls at 5 and 7 years, respectively.

Monthly pasture growth data were obtained from AussieGRASS 11. Pasture composition included native couch (*Cynodon dactylon*), kangaroo grass (*Themeda triandra*), spear grass (*Austrostipa* spp.), with pangola (*Digitaria eriantha*), Rhodes (*Chloris gayana*), and bluegrass (*Dichanthium* spp.) as minor species. Cleared areas supported Wynn cassia (*Chamaecrista rotundifolia*) and stylo (*Stylosanthes guianensis*). Predominantly sandy-loam soils were divided into four paddocks (76.5 ha each), with breeders rotated monthly. Supplementary feeding occurred June–November via 20% urea lick blocks (50–150 g head⁻¹ day⁻¹); weaners (<150 kg LW) received hay October–December in a 50-ha paddock. Herd rotation was monthly across paddocks.

- 1. Cattle farm 2 (C2) Surat, Queensland (QLD)

Farm C2 comprised two properties (5,410 ha total), approximately 30 km apart, under comparable climate, soil, and pasture conditions. The herd was modelled in GrassGro1,2 as 480 mature Hereford cows (570 kg), 24 bulls, and associated young stock, resulting in approximately 990 AEs, equivalent to 8,330 DSEs. Cows and 15-month-old heifers were joined with 800 kg Hereford bulls (1 per 58 cows) in October. Calving occurred 11 July; weaning 30 April. Non-replacement heifers and steers were sold post-weaning at 380–400 kg LW or by 31 December. Young stock were sold earlier if average liveweight gain (LWG) fell below 0.2 kg day⁻¹ over 14 days. Self-replacing cows aged 10–11 years were CFA end-April.

Pastures were primarily *Panicum coloratum* (Bambatsi) and *Medicago truncatula* (Paraggio medic). Low pasture supply was addressed through agistment rather than supplementary feed. In GrassGro, cows and replacement heifers were moved to feedlots when body condition score (BCS) was <1.0, non-replacement stock when BCS was <0.5. Feedlot rations: 70% wheat, 30% hay (DMD 79%, CP 13%). Animals returned to pasture when total DM >1,500 kg DM ha⁻¹. Head-days in feedlots were summed annually to calculate long-term averages of head-weeks off pasture.

- 1. Cattle farm 3 (C3) Woodhouselee, New South Wales (NSW)

Farm C3 had 280 mature Angus cows (500 kg), 15 bulls, and associated young stock, stocked at 0.45 cows ha⁻¹, resulting in approximately 610 AEs, equivalent to 5,120 DSE. Cows and 15-month-old heifers were mated with 700 kg Angus bulls (1 per 20 cows) on 15 June; calving began 25 March, weaning 15 January. Non-replacement heifers and steers sold post-weaning at 380 kg LW or by 31 December. Self-replacing cows were CFA at 8–9 years.

Within GrassGro, the herd grazed two equal paddocks (368 ha total): one dominated by *Austrostipa* spp., the other by *Phalaris aquatica*, *Trifolium subterraneum*, and *Dactylis glomerata*. Grazing management withheld one paddock 7 days, moving stock when predicted daily LWG improved in the alternate paddock. Supplementary feeding with silage (80%) and hay (20%; DMD 61%, CP 13%) occurred when BCS was <2.5.

Soil organic carbon-focused interventions were modelled using the SGS Pasture Model4 . The modelled herd: 550 kg Angus cows (0.41 head ha⁻¹) joined to 950 kg Angus bulls (1 per 50 cows) on 26 September; calving 6 July, weaning 6 April. Non-replacement heifers and steers sold post-weaning at 350 kg LW or by 5 July. Supplementary hay (DMD 54%, CP 8%) provided during pasture deficits to maintain LW and LWG targets.

- 1. Cattle farm 4 (C4) Mount Magnet, Western Australia (WA)

Farm C4 was a single 190,000 ha paddock with 850 breeding cows, 40 bulls, and associated young stock. The CLEM model3 simulated approximately 2,475 AEs, equivalent to 20,775 DSEs, with northern Bos taurus breed cattle. Herd size was dynamically adjusted based on pasture availability to prevent collapse under low rainfall. Destocking was projected 2 months ahead in May to maintain residual 50 kg DM ha⁻¹.

A single annual muster occurred April–May. Weaning at 120 kg LW (approximately 70% success). Steers and surplus bulls sold >300 kg LW; non-replacement heifers and steers at 13 months (approximately 260 kg LW). Animals with relative condition <0.75 were moved to a finishing paddock, fed hay until relative condition =0.8, then sold or returned to pasture.

Monthly pasture production data from AussieGRASS11 (Eastern Murchison sub-IBRA, MUR01) represented seasonal biomass 500–2,000 kg DM ha⁻¹. Soil N in new growth increased from 2.7% → 3.0% to account for high-quality forage (e.g., saltbush *Atriplex* spp.) not explicitly modelled. Urea and hay supplementation June–December reflected nutritional benefits otherwise obtained from woody vegetation.

- 1. Cattle farm 5 (C5) Oodnadatta, South Australia (SA)

Farm C5 (SA) was modelled as a single 448,200 ha grazed paddock supporting 1,800 breeding cows, 70 bulls, and associated young stock. Using the CLEM model3, the total herd size was estimated at approximately 5,890 AEs, equivalent to 49,440 DSEs. The herd comprised Angus, Angus × Poll Hereford, and Santa Gertrudis × Poll Hereford cattle, represented as modified northern breed types to reflect larger *Bos taurus* phenotypes in CLEM.

Mating was continuous and uncontrolled, with calving concentrated in late spring and summer. Weaning occurred in April–May and September–October when calves exceeded 150 kg liveweight (LW), with an average weaning rate of approximately 80%. Stud bulls were purchased annually (mean of seven per year). Target sale liveweights were: 427–450 kg for steers, 335 kg for surplus heifers, 400–700 kg for cows at 7 years, and bulls were CFA at 8 years.

Replicating observed herd dynamics under the region’s low and highly variable rainfall was challenging, due to multiple drought periods, absence of supplementary feeding, and limited access to replacement breeders for herd recovery. To reflect farm management in silico, destocking rules were applied each May based on projected pasture availability for the subsequent seven months (assuming no additional growth). This approach reduced herd numbers under feed scarcity by lowering sale weight thresholds.

To support herd stability under feed-limited conditions, saltbush (*Atriplex* spp.) was incorporated as both a daily and emergency feed source. Monthly pasture production data were obtained from AussieGRASS 11 , using average monthly values for the Stony Plains Oodnadatta sub-IBRA region (STP02). The property encompassed multiple land systems, predominantly flood-out and waterhole country: approximately 26% Oodnadatta land type (supporting *Iseilema spp.* and saltbush, with higher growth in Gilgai areas) and 71% Baltana land type (dominated by *Astrebla spp.* and saltbush, characterized by lower growth rates but greater standing dry matter). Although small differences in monthly growth and standing biomass were observed between Oodnadatta and Baltana, these were insufficient to warrant separate modelling of each system given the management complexity involved.

Adjusting nitrogen concentration in new pasture growth from 2.7% to 3.0% alone did not support the reported herd size, resulting in simulated weight loss under pasture limitation where animals would otherwise have consumed browse. To achieve the reported herd size and maintain herd condition throughout the simulation—including drought years—saltbush was incorporated as an additional feed source. Feed quality parameters were based on Old Man Saltbush data from FutureBeef 17, using the lower bounds of reported values: metabolizable energy (ME) 8–11 MJ kg⁻¹ DM, crude protein (CP) 15–20%, dry matter digestibility (DMD) 55–70%, digestible protein 70–80%, and ash content 15–40%. Protein content and energy availability was adjusted downward to reflect 70–80% protein digestibility and 40–50 MJ kg⁻¹ DM effective energy.

Saltbush biomass and population dynamics were not explicitly modelled; it was treated as a naturally occurring, effectively an unlimited feed resource. Potential mineral imbalances arising from salt content were not considered; saltbush was therefore incorporated solely as an additional source of crude protein and energy.

A sensitivity analysis was undertaken using the baseline setup to determine optimal saltbush inclusion levels and supplementary feeding triggers that maintained herd dynamics consistent with farmer-reported observations, without requiring additional breeder purchases (Fig. S3). The model best reflected observed herd performance when 10% of daily intake comprised high-quality saltbush under normal conditions, increasing to up to 75% of daily intake when pasture biomass fell below 30 kg DM ha⁻¹. These adjustments provided a realistic feed source during low rainfall periods, prevented high mortality, and maintained herd numbers at levels observed on farm.


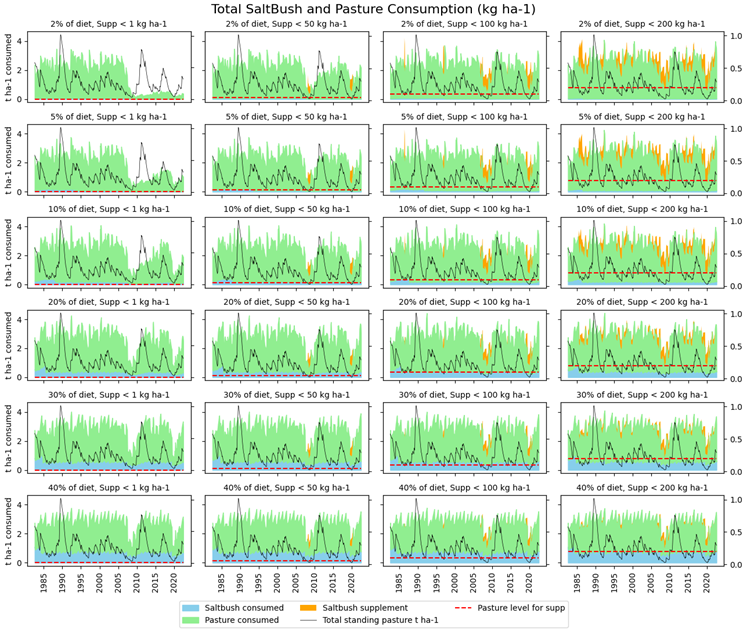


**Supplementary methods Fig. S3. Sensitivity analysis of feed intake dynamics for case study farm C5 (SA) modelled in CLEM.** This analysis examines how variation in saltbush availability (<1–200 kg DM ha⁻¹) and dietary inclusion (2–40% of total intake) influences consumption of pasture, saltbush, and supplementary feed under the mitigation interventions described in Table 1. Columns show increasing saltbush availability; rows show dietary proportion of saltbush. Red dashed line indicates the long-term average pasture biomass threshold required to maintain supplementation. This analysis illustrates ecosystem and dietary constraints on forage use, highlighting trade-offs between native browse, pasture availability, and supplemental feeding strategies in extensive livestock systems.

- 1. Cattle farm 6 (C6) Sturt Plateau, Northern Territory (NT)

Farm C6 (NT) was modelled in CLEM assuming that the grazable area comprised all land within four kilometres of permanent watering points, with animals unable to access areas beyond this radius. Within this constraint, the effective grazed area encompassed two dominant land types: (i) Northern Barkly alluvial cracking clays (31,560 ha) and (ii) red savanna (Bulwaddy land type) of the southern Sturt Plateau (66,910 ha). Seasonal herd movement was explicitly represented, with all animals grazing the alluvial pastures during the dry season (May–September) and transitioning to the red savanna pastures in October for the wet season. This seasonal shift was implemented slightly earlier than reported by managers, reflecting the declining quality of *Astrebla* (Mitchell grass) later in the dry season.

The herd comprised 2,000 breeders, 90 bulls, and associated young stock, represented using the *Bos indicus* herd model within CLEM4. On average, between 50 and 200 “webbed” females (defined below) were present each month, with CLEM estimating a total herd size of approximately 4,560 AEs, equivalent to 38,335 DSEs. Although mating on-farm was continuous and uncontrolled, the model implemented controlled mating between November and February to reflect the condensed calving period (August–November) reported by the farmer. Females were eligible to conceive at ≥9 months of age and with body condition scores (BCS) >2, with a monthly conception probability of 75% during the mating period. This approach resulted in staggered births across several months. Approximately 19 bulls were purchased annually to maintain herd performance. Farm-bred males were not castrated, consistent with reality.

Herd management focused on maintaining breeder numbers while ensuring that only productive individuals utilised available pasture resources. Substantial numbers of females were sold annually to regulate herd size. Excess heifers were typically spayed on-farm (not explicitly required in the model), while older and non-productive (“dry”) cows were “webbed” to prevent further conception after completing lactation; webbed females were sold approximately two years later. In the model, females were classified as dry if they failed to conceive in two consecutive mating seasons. This outcome was stochastic, reflecting weight-based rather than physiological infertility. The farmer’s practice of growing cattle to higher sale weights prior to trucking was represented by additional feeding to improve body condition. An additional 2% of animals were randomly sold each year to reflect destocking associated with temperament issues or disease burden.

Underweight animals identified for sale—including webbed females, weaned males, and non-sire bulls—were fed a pelleted ration prior to trucking. The ration was assumed to have 80% dry matter digestibility (DMD; 90% for grain) and a nitrogen concentration of 1.3%. Animals received 55% of their potential intake (scaled for body size), corresponding to the reported purchase of approximately 100 t N annually. Sale weights were set at >300 kg for steers, with cast-for-age webbed cows and bulls sold at 7 and 6 years of age, respectively. Any breeder remaining empty 19 months post-calving was also sold.

Pasture production was simulated using the GRASP model 18. A pasture data cube was generated across combinations of land condition (classes 1–11), grass basal area (GBA; classes 1–5), and stocking rate, using historical rainfall data spanning 1891–2022. GRASP parameter files (.mrx) were supplied by Robyn Cowley and Caroline Pettit (NT Department of Industry, Tourism and Trade, DITT). Given differences in soil type, waterlogging, and grazing management between cracking clay and loam soils, the two pasture types were modelled as separate paddocks, with explicit seasonal herd movement: grazing alluvial pastures from May to September (dry season) and red savanna pastures from October to April (wet season).

For the Northern Barkly alluvial cracking clay pastures, parameterisation was based on two SWIFTSYND sites at Beetaloo—one in the Creswell land system and one in Joanundah—representing the dominant alluvial land types on C6. Safe utilisation was set at 20%, and nitrogen concentration of new pasture growth was reduced to 0.6% to reflect the poor end-of-season forage quality reported by managers. Initial land condition was set to class 5, reducing pasture productivity to better reflect property conditions, with degradation permitted to land condition class 8. Initial GBA was set to class 2. Rates of change in land condition and GBA as a function of utilisation were adjusted to 20% to ensure no change at the safe utilisation threshold, following Scanlan et al. 19 and advice from Robyn Cowley (NT DITT).

Pasture parameters for the red loam (“red savanna”) soils were based on two SWIFTSYND sites from Bulwaddy land systems on the Sturt Plateau. Although regional mapping suggests *Spinifex* dominance, field observations at C6 indicated *Eucalyptus–Corymbia* savannas with moderately palatable perennial grasses, including *Sehima* and *Chrysopogon* species (pers. comm. Robyn Cowley). Accordingly, safe utilisation was set at 10%. Foliage projected cover varied substantially across dense Lancewood and Bulwaddy thickets to more open areas; therefore, average total basal area from Bulwaddy SWIFTSYND sites was applied. Initial land condition and GBA were set at classes 7 and 2, respectively, reducing pasture productivity to levels consistent with observed property performance.

- 1. Sheep farm 1 (S1) Campbell Town, Tasmania (TAS)

Farm S1 (TAS) comprised three self-replacing Merino sheep flocks and one cattle herd grazing 3,170 ha of the total 7,777 ha property. A small nucleus of the highest-performing ewes was bred via artificial insemination to produce rams for the flock; however, because this group was small (450 mature ewes), it was incorporated into the wool flock for modelling purposes. The cattle herd was converted into DSE, and the two sheep enterprises (wool and meat) were scaled to maintain equivalent DSE ha⁻¹ grazing pressure relative to the existing farm system. GrassGro estimated a total grazing pressure of approximately 25,100 DSEs, equivalent to 2,990 AEs, across the grazing platform.

The parameterised wool flock in GrassGro 1,2 consisted of 41 kg Merino ewes bred to Merino rams, stocked at 2.8 ewes ha⁻¹, with wethers stocked at 2.7 wethers ha⁻¹. Ewes and wethers were replaced annually on 1 September. Older ewes were CFA on 31 August at 4–5 years of age, while wethers were sold on 14 October at 5–6 years of age. CFA ewes from the wool flock were transferred to the meat flock rather than breeding replacements within the meat flock. Ewes were joined on 22 April, with maiden ewes lambing for the first time at two years of age. Conception rate was set at 80% single-bearing ewes. Lambs were weaned on 14 January, with non-replacement ewe and wether lambs sold at 19 weeks of age. Shearing occurred on 20 July for all animals, producing an average greasy fleece weight of 4.65 kg, 70% yield, and fibre diameter of 17.3 µm.

The wool flock grazed 2,777 ha divided into six paddocks of varying size, comprising *Phalaris aquatica*, subterranean clover (*Trifolium subterraneum*), irrigated dual-purpose wheat (*Triticum aestivum*, represented in GrassGro as annual ryegrass *Lolium multiflorum*), irrigated lucerne (*Medicago sativa*), weeping grass (*Microlaena* spp.), and wallaby grass (*Austrodanthonia* spp.). Grazing rotations varied seasonally to allow reseeding of native grasses and seed harvest from wheat and Phalaris-only paddocks, while the lucerne paddock was periodically closed for hay harvest.

Ewes CFA from the wool flock were transferred annually to the meat flock at 4–5 years of age (1 September). These ewes remained on wool-flock pastures until just prior to lambing, after which they were joined with meat rams (Suffolk, implemented in GrassGro) and cast-for-age at 6–7 years (16 December). Meat-flock ewes were stocked at 9.6 ewes ha⁻¹, joined on 11 April, and exhibited conception rates of 91% single- and 2% twin-bearing ewes. Lambs were born on 7 September, weaned and sold on 15 December. Shearing occurred on 20 July, producing 4.15 kg greasy fleece (70% yield; 17.4 µm fibre diameter). The meat flock grazed three equally sized paddocks comprising Phalaris and subterranean clover, with one paddock closed annually for hay harvest.

Supplementary feeding was implemented using condition-score thresholds. Wool-flock ewes and young stock were fed wheat grain (81% DMD; 12% crude protein, CP) when condition score fell below 2.5, while wethers were supplemented when condition score fell below 2.0. Meat-flock ewes and lambs received a 78:22 blend of wheat grain and hay (81% DMD; 12% CP) when condition score dropped below 2.5. All ewes were fed the same 78:22 wheat–hay blend in the farm feedlot from mid-January to mid-April. Irrigated paddocks were watered between 1 September and 31 March to maintain soil moisture at 95% of field capacity.

- 1. Sheep farm 2 (S2) Meningie, South Australia (SA)

Farm S2 (SA) was a predominantly self-replacing Merino sheep enterprise, parameterised in GrassGro. The farm comprised 67 kg Merino ewes, nominally stocked at 1.9 ewes ha⁻¹, representing approximately 4,055 DSEs, equivalent to 480 AEs. Unlike other sheep case study farms, S2 purchased replacement ewes rather than breeding replacements on-farm. Each year, 70 kg ewes aged five years were purchased on 7 September, retained within the flock for two years, and CFA on 17 August at 7–8 years of age.

Ewes were joined to Border Leicester rams on 1 November, with conception rates of 86% single- and 14% twin-bearing ewes. Lambing commenced on 29 March, and lambs were weaned on 23 June. Ewe lambs were sold between 27 October and 14 November at a target liveweight of 60 kg, while wether lambs were sold between 16 August and 30 September at a target liveweight of 46 kg.

The main flock was shorn on 1 July, while weaners were shorn on 15 September. Fleece characteristics were 5.0 kg greasy fleece weight, 68% yield, and 20.7 µm fibre diameter. The grazing platform comprised two paddocks (372.5 ha each) sown to lucerne (*Medicago sativa*) and cocksfoot (*Dactylis glomerata*), and a third paddock (120 ha) sown to lucerne and perennial ryegrass (*Lolium perenne*). This latter paddock was used to represent grazing barley (*Hordeum vulgare*) within GrassGro. Grazing rotations varied seasonally, with distinct rotation schedules applied to ewes and young lambs to optimise pasture utilisation.

Supplementary feeding was implemented using condition-score and feed-availability thresholds. Silage (80% dry matter digestibility [DMD]; 18% crude protein [CP]) was provided to young and mature ewes between 15 February and 30 March when condition scores fell below 3.0, and between 31 March and 14 February when condition scores fell below 1.5 or available feed declined below 750 kg DM ha⁻¹. Weaned wether lambs received the same silage year-round when condition scores fell below 2.0 or pasture availability declined below 500 kg DM ha⁻¹.

- 1. Sheep farm 3 (S3) Ballarat, Victoria (Vic)

Farm S3 (VIC) comprised two self-replacing Merino sheep enterprises: a wool flock grazing 340 ha and a meat flock grazing 260 ha. The GrassGro-modelled wool flock consisted of 45 kg ewes bred to medium-sized Merino rams, nominally stocked at 8.1 ewes ha⁻¹, representing approximately 9,825 DSEs, equivalent to 1,170 AEs. Ewes were replaced annually on 1 January and cast-for-age on 31 December at 6–7 years of age. Ewes were joined to Merino rams on 19 March, with maiden ewes lambing for the first time at two years of age. Conception rates were set at 75% single- and 25% twin-bearing ewes.

Lambs were born on 15 August and weaned on 15 November, with wether lambs sold at a target liveweight of 45 kg between 12 and 15 months of age. The wool flock was modelled as a single set-stocked paddock containing perennial ryegrass (*Lolium perenne*), *Phalaris aquatica*, and subterranean clover (*Trifolium subterraneum*).

Wool flock ewes and young stock were fed silage (67% DMD; 15% CP) year-round when condition scores fell below 2.0. An additional production rule was implemented whereby all stock received a 70:30 blend of field beans and silage (80% DMD; 25% CP) from 1 January to 1 May when total available feed fell below 1,500 kg DM ha⁻¹.

Approximately 580 wool flock ewe lambs were retained annually and transferred to the meat flock on 1 January at five months of age and 30 kg liveweight to become maiden ewes. The meat flock was stocked at a nominal rate of 11 ewes ha⁻¹. Ewes were joined to Dorset rams on 16 February, with maiden ewes lambing for the first time at two years of age. Conception rates were 60% single-, 35% twin-, and 5% triple-bearing ewes. Older ewes were cast-for-age on 31 December at 5–6 years of age. Lambs were born on 14 July, weaned on 1 November, and sold at a target liveweight of 38 kg between 20 and 26 weeks of age.

Shearing occurred on 30 April for the wool flock (4.3 kg greasy fleece; 70% yield; 17.2 µm fibre diameter) and on 20 April for the meat flock (4.6 kg greasy fleece; 70% yield; 17.8 µm fibre diameter). The same pasture composition, maintenance feeding, and production rules applied to the wool flock were also implemented for the meat flock.

- 1. Sheep farm 4 (S4) Murrumbateman, New South Wales (NSW)

Farm S4 (NSW) was a self-replacing ultrafine Merino sheep enterprise. The parameterised farm in GrassGro comprised 42 kg ewes stocked at 3.1 head ha⁻¹ and wethers stocked at 0.4 head ha⁻¹, representing approximately 950 DSEs, equivalent to 110 AEs. Ewes and wethers were replaced annually on 1 April, with ewes cast-for-age on 1 March at 5–6 years of age and wethers cast-for-age on 1 March at 4–5 years of age.

Ewes were joined to Merino rams on 15 April, with maiden ewes lambing for the first time at two years of age. Conception rates were 90% single- and 10% twin-bearing ewes. Lambs were born on 4 September and weaned on 1 December, with non-replacement ewe and wether lambs sold at 52 weeks of age. Shearing occurred on 1 August, with breed characteristics of 3.52 kg greasy fleece weight, 72% yield, and 14 µm fibre diameter.

The grazing system comprised a single set-stocked paddock of 160 ha containing weeping grass (*Microlaena* spp.), annual grasses (non-descript in GrassGro), subterranean clover (*Trifolium subterraneum*), and *Phalaris aquatica*. All stock were fed hay (53% DMD; 20% CP) in the paddock when condition scores fell below 2.0. An additional production rule specified that supplementary hay of the same quality was fed to all stock at approximately 0.05 kg DM head⁻¹ from 1 June to 31 July.

- 1. Sheep farm 5 (S5) Kulin, Western Australia (WA)

Farm S5 (WA) comprised two self-replacing sheep enterprises modelled separately in GrassGro, each allocated half of the total grazing area: a Merino/composite wool flock and a self-shedding meat flock. Total stocking was estimated at approximately 8,515 DSEs, equivalent to 1,015 AEs.

The wool flock consisted of 70 kg ewes nominally stocked at 1.1 head ha⁻¹. Ewes were replaced annually on 28 December and cast-for-age on 1 December at 5–6 years of age. Ewes were joined to large Merino rams on 19 December, with maiden ewes lambing for the first time at two years of age. Conception rates were 78% single- and 22% twin-bearing ewes. Lambs were born on 16 May and weaned on 1 October. Non-replacement lambs were sold at a target liveweight of 45 kg, with ewe lambs sold between 34 and 48 weeks of age and wether lambs sold between 27 and 48 weeks of age. Shearing occurred between 30 January and 1 February, producing fleeces of 7.5 kg greasy weight, 72% yield, and 21 µm fibre diameter.

The meat flock consisted of Border Leicester × Merino ewes (70 kg), also stocked at 1.1 head ha⁻¹. Ewes were replaced annually on 20 January, with CFA ewes sold on 22 December at 4–5 years of age. Ewes were joined to Border Leicester × Merino rams on 4 February, with maiden ewes lambing for the first time at two years of age. Conception rates were 48% single- and 52% twin-bearing ewes. Lambs were born on 2 July, weaned on 10 November, and non-replacement ewe and wether lambs sold between 30 and 43 weeks of age at a target liveweight of 55 kg. As the meat flock shed wool naturally, no saleable fleece was assumed.

Each flock grazed a single set-stocked 1,742 ha paddock containing subterranean clover (*Trifolium subterraneum*), annual ryegrass (*Lolium multiflorum*), and capeweed (*Arctotheca calendula*). Wool ewes were fed a 90:10 barley straw–lupins (*Lupinus angustifolius*) blend (68% DMD; 10% CP) year-round in an on-farm feedlot when condition scores fell below 2.0, while weaners received the same ration in the paddock under identical condition-score rules.

Additional production rules were implemented. Wool flock lambs were fed an 80:20 barley grain–lupins blend (76% DMD; 16% CP) in the paddock from 1 January to 1 April to achieve 42 kg liveweight. Meat flock lambs received the same blend from 1 January to 30 April to achieve 50 kg liveweight. Three supplementary feeding rules were applied to ewes:

1. Rule 1: *Ad libitum* 70:30 barley grain–barley straw blend (76% DMD; 10% CP) in the paddock from 1–22 December when available green feed fell below 500 kg DM ha⁻¹, with a return to pasture once feed exceeded 1,000 kg DM ha⁻¹.
2. Rule 2: *Ad libitum* 70:30 barley straw–barley grain blend (59% DMD; 9% CP) from 23 December to 1 March under the same feed thresholds, representing residual grazing on barley stubble.
3. Rule 3: *Ad libitum* 90:10 barley grain–lupins blend with urea mineral lick (68% DMD; 12% CP) in the feedlot from 2 March to 20 April for the wool flock, or from 2 March to 30 April for the meat flock, when available green feed fell below 500 kg DM ha⁻¹, with a return to grazing once feed exceeded 1,000 kg DM ha⁻¹.
   1. Sheep farm 6 (S6) Warrnambool, Victoria (VIC)

Farm S6 (VIC) was located near Warrnambool in a medium–high rainfall zone. The parameterised self-replacing Merino flock in GrassGro consisted of 45 kg ewes stocked at 9.8 ewes ha⁻¹, with wethers stocked at 9.8 wethers ha⁻¹, representing approximately 10,830 DSEs, equivalent to 1,290 AEs. Ewes and wethers were replaced annually on 1 January, with ewes cast-for-age on 30 November at 5–6 years of age and wethers cast-for-age on 30 May at 5–6 years of age.

All ewes were joined to Merino rams on 9 April, with maiden ewes lambing for the first time at two years of age. Conception rates were 90% single- and 10% twin-bearing ewes. Lambs were born on 5 September and weaned on 29 November. Non-replacement ewe lambs were sold at 34 weeks of age, while wether lambs were sold at 12 weeks of age. Shearing occurred on 15 December for mature sheep and 1 December for weaners, with breed characteristics of 4.95 kg greasy fleece weight, 74% yield, and 17 µm fibre diameter.

A set-stocked paddock of 440 ha was modelled, containing perennial ryegrass (*Lolium perenne*), *Phalaris aquatica* and subterranean clover (*Trifolium subterraneum*). Maintenance feeding rules specified that all ewes and young stock were fed a 90:10 barley grain–beans ration (92% DMD; 13% CP) when condition scores fell below 2.0. Weaner ewes received the same supplement at 0.06 kg DM head⁻¹ from 1–31 December, increasing to 0.14 kg DM head⁻¹ from 1 February to 31 March, and further to 0.16 kg DM head⁻¹ from 1 April to 30 April.

- 1. Sheep farm 7 (S7) Naracoorte, South Australia (SA)

Farm S7 (SA) was located on the South Australian–Victoria border in a medium rainfall zone. The parameterised farm in GrassGro comprised a self-replacing Border Leicester × Merino flock with 60 kg ewes stocked at 14.3 ewes ha⁻¹, representing approximately 55,755 DSEs, equivalent to 6,640 AEs. Ewes were replaced annually on 15 February and cast-for-age on 15 October at 5–6 years of age.

All ewes were joined to crossbred rams on 15 February. Conception rates were 55% single- and 45% twin-bearing ewes, with maiden ewes lambing for the first time at one year of age. Lambs were born on 13 July and weaned on 1 November. Non-replacement ewe lambs were sold at a target liveweight of 37.5 kg between 20 and 25 weeks of age, while wether lambs were sold at a target liveweight of 40 kg between 20 and 24 weeks of age. Shearing occurred on 15 December, producing fleeces of 3.87 kg greasy weight, 75% yield, and 29.5 µm fibre diameter.

The grazing system comprised a single set-stocked paddock of 1,880 ha containing perennial ryegrass (*Lolium perenne*) and subterranean clover (*Trifolium subterraneum*). All stock were fed an 85:15 silage–hay blend (62% DMD; 14% CP) in the paddock when condition scores fell below 2.0. All ewes were fed lupins (80% DMD; 28% CP) at 0.33 kg DM head⁻¹ in the paddock from 1–28 February to enhance reproductive performance (flushing).

1. Economic and financial analysis
   1. Meat prices

Time-series livestock price data spanning 2012–2023 (inclusive) were obtained from the Meat & Livestock Australia (MLA) database20. These data underpin the enterprise-level profitability analyses presented in the main paper (Fig. 1, Fig. 2) and Supplementary economic outputs. Price series were matched to the livestock classes, sale ages, and sale weights simulated for each case study farm (Section 2). To convert simulated liveweight at sale to saleable meat weight, a dressing percentage of 47% was assumed for all sheep enterprises, consistent with standard Australian abattoir yields. For cattle enterprises, dressing percentages of 50–54% were applied, depending on stock class, liveweight, and regional production system, reflecting differences between northern and southern production environments and aligning with the herd structures described for cattle farms C1–C6 (Section 2.1–2.6)21.

**Supplementary Methods Table S1. Low and high liveweight prices for six cattle farms (C1-6) and several sheep farms (S1-7).** Long-term low (25th percentile) and high (75th percentile) inflation-adjusted prices for young animals (steers and heifers) and mature animals (cows and bulls) were used to parameterise economic scenarios in the enterprise profitability assessment. For C6 (NT), as stock were transported to Queensland for finishing or slaughter, Queensland prices were applied. LW = liveweight. Abbreviations in brackets denote Australian States and Territories: NSW, New South Wales, NT, Northern Territory, QLD, Queensland, SA, South Australia, TAS, Tasmania; VIC, Victoria; WA, Western Australia. Costs expressed in Australian cents (AU cents).

| **Case study farm (state)** | **Stock class** | **Low price**  **(AU cents kg LW-1)** | **High price**  **(AU cents kg LW-1)** |
| --- | --- | --- | --- |
| C1 (QLD) | Steers | 230.33 | 354.04 |
| Heifers | 204.65 | 323.8 |
| Cows & Bulls | 196.80 | 301.59 |
| C2 (QLD) | Steers | 230.33 | 354.04 |
| Heifers | 204.65 | 323.8 |
| Cows & Bulls | 196.80 | 301.59 |
| C3 (NSW) | Steers | 232.27 | 365.34 |
| Heifers | 207.31 | 335.14 |
| Cows & Bulls | 193.80 | 310.84 |
| C4 (WA) | Steers | 245.54 | 344.53 |
| Heifers | 221.45 | 325.17 |
| Cows & Bulls | 203.13 | 270.40 |
| C5 (SA) | Steers | 247.10 | 386.43 |
| Heifers | 206.27 | 350.37 |
| Cows & Bulls | 185.42 | 306.13 |
| C6 (NT) | Steers | 230.33 | 354.04 |
| Heifers | 204.65 | 323.8 |
| Cows & Bulls | 196.80 | 301.59 |
| S1 (TAS) | Wethers | 172.17 | 290.74 |
| Ewes | 135.09 | 247.52 |
| Lambs | 288.01 | 357.57 |
| S2 (SA) | Ewes | 130.89 | 252.08 |
| Lambs | 282.40 | 372.12 |
| S3 (VIC) | Ewes | 140.89 | 241.55 |
| Lambs | 266.41 | 374.90 |
| S4 (NSW) | Wethers | 162.17 | 282.34 |
| Ewes | 159.92 | 266.03 |
| Lambs | 274.38 | 375.23 |
| S5 (WA) | Merino & crossbred ewes | 147.38 | 253.17 |
| Merino & crossbred lambs | 218.21 | 321.82 |
| S6 (VIC) | Wethers | 147.40 | 234.86 |
| Ewes | 140.89 | 241.55 |
| Wether lambs (18-24 kg) | 290.11 | 388.93 |
| Ewe lambs (24-30 kg) | 289.32 | 387.27 |
| S7 (SA) | Ewes | 130.89 | 252.08 |
| Lambs | 282.40 | 372.12 |

Analysis of variance (ANOVA) was undertaken to test for differences in livestock prices across states, sale destinations (abattoir versus saleyard), and weight classes. Significant state-level differences were detected for the same livestock class. Accordingly, state-specific price series were applied throughout the analysis, and livestock were assumed to be sold intrastate at the relevant state price. Assignment of livestock classes to sale destinations was informed by farm-specific management descriptions (Section 2) and ensured consistency between simulated production systems and observed marketing pathways.

All price series were converted to real terms using the Consumer Price Index (CPI) published by the Reserve Bank of Australia 22 ensuring comparability across the analysis period and consistency with other economic inputs (Supplementary Tables S1–S4). For each livestock class, the inflation-adjusted long-term mean price was used as the central (“most likely”) price in baseline profitability estimates. To capture price variability and market uncertainty, the 25th and 75th percentiles of the historical price distribution were used to define low- and high-price scenarios, respectively. These scenarios were propagated through all economic analyses, including intervention assessments and sensitivity analyses (Table S1; Fig. 2). This approach ensured that livestock prices were consistent with simulated herd dynamics and animal performance across case study farms, while also capturing realistic interannual market variability relevant to long-term profitability and emissions-intensity outcomes.

- 1. Wool prices

Wool prices were standardised across sheep case study farms using market data from the Australian Wool Exchange (AWEX)23 to ensure consistency in enterprise-level economic assessments (Fig. 1, Fig. 2; Table S2). Fibre diameter–specific prices were assigned based on simulated fleece characteristics (fibre diameter, greasy fleece weight, and yield) generated by GrassGro for baseline and intervention scenarios (Sections 2.7–2.13).

AWEX indicator prices were available for fibre diameters between 17 and 32 µm. To accommodate ultrafine and broader-fibre systems outside this range—particularly the ultrafine Merino enterprise at S4 (NSW) and selected intervention scenarios—prices were extrapolated using an exponential relationship between fibre diameter and clean fleece price:

where is fibre diameter (µm). This function yielded predicted prices spanning 400–2,400 AU cents kg⁻¹ clean fleece weight across the full range of simulated fibre diameters. Extrapolated prices were cross-checked against farmer-reported wool returns to ensure consistency with observed long-term enterprise performance. Wool prices were subsequently inflation-adjusted using the same CPI framework as meat prices (Section 3.1), enabling consistent comparison of wool and meat revenue streams across farms, interventions, and pricing scenarios.

- 1. Farm input and management costs

For farm inputs, animal husbandry, and selling costs associated with both meat and wool production, standardised prices were applied across all case study farms to ensure that differences in economic outcomes reflected the effects of management interventions rather than variation in price or cost assumptions (Table S3). These standardised costs were applied consistently across baseline and intervention scenarios, enabling direct comparison of profitability responses among farms and interventions (Fig. 1–3).

Several costs associated with baseline farm systems were parameterised using individual farmer records, including repairs and general maintenance (Table S4). This approach preserved realism in enterprise cost structures while maintaining comparability across farms. For interventions that reduced farm inputs, costs were adjusted proportionally to reflect changes in input use. For example, spray and weed control costs were reduced by 10% under the intervention involving planting native trees on 10% of the grazing area. Where farmers reported total expenditures for specific inputs (for example, mineral licks), costs were converted to per-head values (AUD head⁻¹) by dividing total expenditure by the number of animals receiving the input. This enabled total costs to scale dynamically with changes in livestock numbers arising from interventions.

Agistment costs for farm C2 (QLD) were applied consistently across baseline and intervention scenarios. GrassGro was used to estimate the total number of head·weeks that stock were off-farm, with agistment costs calculated accordingly. This ensured that off-farm feeding and management responses to pasture deficits were represented consistently within the enterprise profitability assessment.

**Supplementary methods Table S2. Wool prices as a function of fibre diameter for the seven sheep case study farms (S1-7).** Data show wool prices (AU cents kg⁻¹ clean fleece weight) for each farm, derived from Australian Wool Innovation weekly market reports 24 and used to parameterise enterprise profitability across baseline and intervention scenarios. Prices for farm S4 (NSW) include adjustments for farm-specific interventions involving single lambing combined with altered fibre diameter. Specifically, the wool price for 14 µm fibre (S4, NSW) was applied to the baseline and all interventions except the farm-specific scenario, and was extrapolated using an exponential curve fitted to prices for 17–32 µm wool. For the farm-specific intervention, the price for 11 µm wool (S4, NSW) was extrapolated from the same curve. These prices were integrated with biophysical model outputs of fleece weight and fibre diameter to calculate revenue under low- and high-price scenarios, providing consistent inputs for gross margin and economic analyses across all mitigation interventions. Abbreviations in brackets indicate Australian States: NSW, New South Wales; SA, South Australia; TAS, Tasmania; VIC, Victoria; WA, Western Australia. Costs expressed in Australian cents (AU cents).

| **Wool fibre diameter (µ)** | **Farms** | **AU cents kg-1 clean fleece weight** |
| --- | --- | --- |
| 32 |  | 400.8 |
| 30 | S7 (SA) | 577.2 |
| 28 |  | 685.2 |
| 25 |  | 1,003.7 |
| 23 |  | 1,258.2 |
| 21 | S5 (WA), S2 (SA) | 1,678.4 |
| 20 |  | 1,733.0 |
| 19 |  | 1,901.8 |
| 18 | S1 (TAS), S3 (VIC) | 2,016.1 |
| 17 | S6 (VIC) | 2,407.4 |
| 14 | S4 (NSW) | 3,436.1 |
| 11 | S4 (NSW) | 4,851.7 |

**Supplementary methods Table S3. Prices for farm inputs, animal husbandry, and selling costs across case study farms.** Data include the unit costs of purchased feed, livestock husbandry, and associated sales activities, integrated into enterprise gross margin calculations for baseline and intervention scenarios. For Western Australian farms, purchased wheat prices were assumed to represent the opportunity cost of farm-grown wheat fed to livestock. Animal health costs for ewes and weaners incorporated standard management practices including drenching, vaccination, and routine preventative care. Marking and castration costs were accounted for as an additional AUD 0.90 head⁻¹ for wether lambs relative to ewe lambs, and AUD 0.60 head⁻¹ for steers relative to heifers. Shearing costs include all associated activities, including wool classing, shed sundries, wool packs, and an additional AUD 1.25 head⁻¹ for crutching, with no crutching applied to young stock in their first year. These prices were used to parameterise economic outcomes of all mitigation interventions, ensuring consistency in revenue and cost projections across farms and scenarios. Abbreviations: DM = dry matter; kWh = kilowatt hour; NT = Northern Territory, WA = Western Australia. Costs expressed in Australian dollars (AUD).

|  | **Price** | **Unit** |
| --- | --- | --- |
| Single superphosphate | 600 | AUD t⁻¹ |
| Mono-ammonium phosphate | 1,450 | AUD t⁻¹ |
| Di-ammonium phosphate | 850 | AUD t⁻¹ |
| Urea | 500 | AUD t⁻¹ |
| Lime | 100 | AUD t⁻¹ |
| Cattle manure | 50 | AUD t⁻¹ |
| Electricity | 0.3 | AUD kWh⁻¹ |
| Diesel | 1.86 | AUD L⁻¹ |
| Unleaded fuel | 1.94 | AUD L⁻¹ |
| Purchased hay | 300 | AUD t DM⁻¹ |
| Purchased silage | 350 | AUD t DM⁻¹ |
| Purchased lupins & beans | 400 | AUD t DM⁻¹ |
| Purchased wheat (WA) | 437 | AUD t DM⁻¹ |
| Purchased wheat (NT) | 510 | AUD t DM⁻¹ |
| Purchased field beans & grain mix | 300 | AUD t DM⁻¹ |
| Urea supplementation | 500 | AUD t DM⁻¹ |
| Conserved stubble on farm | 35 | AUD t DM⁻¹ |
| Conserved silage on farm | 125 | AUD t DM⁻¹ |
| Conserved hay on farm | 90 | AUD t DM⁻¹ |
| Animal health (ewes) | 3.43 | AUD head⁻¹ |
| Animal health (wethers) | 4.67 | AUD head⁻¹ |
| Animal health (cattle) | 6.79 | AUD head⁻¹ |
| Marking (ewe lambs) | 1.95 | AUD head⁻¹ |
| Marking (wether lambs) | 2.85 | AUD head⁻¹ |
| Marking (heifers) | 26.07 | AUD head⁻¹ |
| Marking (steers) | 26.13 | AUD head⁻¹ |
| Shearing (mature animals) | 9.14 | AUD head⁻¹ |
| Shearing (young stock) | 7.89 | AUD head⁻¹ |
| Purchased bulls | 9,500 | AUD head⁻¹ |
| Livestock sales commission | 0.045 | AUD AUD⁻¹ revenue |
| Wool sales commission | 0.15 | AUD kg⁻¹ clean fleece sold |
| Livestock levies | 5 | AUD head⁻¹ sold |

**Supplementary methods Table S4. Farm baseline costs.** Data represent annual operating costs reported by each producer for their baseline system, capturing site-specific management, labour and input expenses that informed economic modelling of mitigation interventions. C2 and C3 refer to cattle farms; S1–S7 refer to sheep farms. For farm S2 (SA), two values for ewe replacements are provided corresponding to low and high price structures, aligning with low (25th percentile) and high (25th percentile) sheep sale prices used in sensitivity analyses. These cost data were incorporated into gross margin calculations alongside input prices and livestock product prices to generate consistent economic baselines for evaluating intervention scenarios*.* Abbreviations in brackets denote Australian States and Territories: NSW, New South Wales; QLD, Queensland; SA, South Australia; TAS, Tasmania; VIC, Victoria; WA, Western Australia. Costs expressed in Australian dollars (AUD).

| **Case study farm** | **Input** | **Total cost (AU yr-1)** |
| --- | --- | --- |
| C2 (QLD) | Agistment | 7 head-1 week-1 |
| C3 (NSW) | Repairs and maintenance | 18,455 |
| Pasture renovation | 19,678 |
| S1 (TAS) | Repairs and maintenance | 424,000 |
| Spray and weed control | 90,000 |
| Pasture renovation | 103,130 |
| Handling & contractors | 20,000 |
| Breeding costs | 19,123 |
| S2 (SA) | Repairs and maintenance | 5,200 |
| Spray and weed control | 16,128 |
| Sowing | 13,213 |
| Pasture renovation | 27,500 |
| Handling & contractors | 3,609 |
| Transport | 13,139 |
| Supplements | 17,518 |
| Ewe replacements | 97 & 187 |
| S3 (VIC) | Repairs and maintenance | 18,455 |
| Sowing | 19,678 |
| Transport | 7,749 |
| S4 (NSW) | Repairs and maintenance | 13,475 |
| Spray and weed control | 650 |
| Pasture renovation | 3,665 |
| Stock handling & contractors | 1,707 |
| Mineral supplement | 1,550 |
| S5 (WA) | Repairs and maintenance | 20,000 |
| Spray and weed control | 10,000 |
| Pasture renovation | 20,000 |
| Transport- livestock | 12,156 |
| Transport- wool | 1,210 |
| Mineral lick | 20,000 |
| S6 (VIC) | Breeding costs | 22,274 |
| Repairs and maintenance | 8,000 |
| Spray and weed control | 5,000 |
| Pasture renovation | 53,600 |
| S7 (SA) | Repairs and maintenance | 74,000 |
| Pasture renovation | 10,000 |
| Irrigation water | 75,000 |
| Stock handling/contractors | 24,000 |
| Bulk goods transport | 7,000 |

- 1. Costs of antimethanogenic feed additives (3-NOP and *Asparagopsis*)

Costs associated with antimethanogenic feed additives were standardised across farms and scenarios. The cost of implementing 3-nitrooxypropanol (3-NOP) was set at 0.58 AUD head⁻¹ day⁻¹ for cattle and 0.09 AUD head⁻¹ day⁻¹ for sheep 25. The cost of *Asparagopsis* supplementation was set at 1.55 AUD head⁻¹ day⁻¹ for cattle and 0.16 AUD head⁻¹ day⁻¹ for sheep¹² (Table S5). These assumptions were applied consistently across baseline and intervention scenarios to ensure that differences in economic outcomes reflected the effects of the interventions, rather than variation in antimethanogenic additive pricing assumptions.

**Supplementary methods Table S5. Costs of supplying feed-based antimethanogenic compounds—3‑nitrooxypropanol (3‑NOP) and *Asparagopsis*—to weaned cattle and sheep**. Pellet delivery costs were calculated assuming a consumption rate of 100 g DM head⁻¹ day⁻¹ at an additive cost of AUD 550 t DM⁻¹, reflecting commercial formulation and feeding practices. These costs were incorporated into the economic evaluation of enteric methane mitigation interventions, enabling assessment of profitability and cost–benefit trade-offs for cattle and sheep enterprises. Costs expressed in Australian dollars (AUD).

|  |  | **AUD head day-1** |
| --- | --- | --- |
| Cattle | 3-NOP | 0.30 25 |
| *Asparagopsis* | 1.00 26 |
| Pellet delivery | 0.55 |
| Sheep | 3-NOP | 0.03 25 |
| *Asparagopsis* | 0.10 26 |
| Pellet delivery | 0.06 |

- 1. Establishment costs associated with planting native tree species

Potential income from carbon credits associated with the conversion of grazing land to native tree plantings was evaluated within the whole-farm economic framework. Two primary cost components were considered: (a) the direct costs of establishing and maintaining the new land use (e.g. planting and ongoing management of vegetated areas), and (b) the opportunity cost of forgone returns from the existing agricultural enterprise, represented by net grazing returns no longer achievable once land was converted to woodland.

Tree planting interventions were assumed to comprise native species classified as “environmental plantings”, consistent with requirements under the Australian Carbon Credit Unit (ACCU) Scheme, which governs the generation of carbon credits from environmental plantings 27. Economic assessments were undertaken within the broader farm budgeting framework, which accounted for concurrent interventions and their effects on carrying capacity and enterprise performance. As reductions in cattle or sheep numbers resulting from environmental plantings were explicitly represented within whole-farm budgets, these changes were not treated as a direct cost within the carbon planting analysis.

A permanence period of 25 years was assumed, consistent with requirements under the ACCU Scheme. Economic returns evaluated using discounted cash flow analysis to account for the time value of money over the project lifetime. All costs and benefits were aggregated into a single net present value (NPV) metric.

The NPV of converting agricultural land to a carbon-focused land use at a carbon credit price was calculated as:

where is the present value of returns and is the present value of costs associated with land use .

The present value of returns was calculated as:

where represents the quantity of carbon sequestered in year over the project lifetime , defined here as the 25-year permanence period under the ACCU Scheme. The term represents scheme-related discounts applied to generated ACCUs, including a 5% risk-of-reversal buffer and a corresponding 20% permanence discount. The parameter denotes the discount rate applied to future costs and returns.

The present value of costs was calculated as:

where is the establishment cost for carbon land use , and and represent annual maintenance and transaction costs incurred in each year , respectively.

The NPV model (Equation 1) was solved iteratively for carbon credit prices ranging from AUD 1 to AUD 300 t CO₂-eq⁻¹ in AUD 1 increments. The lowest carbon price yielding a positive NPV was identified as the break-even price. Carbon prices were treated as deterministic over the 25-year project lifetime. Results were also reported for two specific carbon prices—AUD 38 t CO₂-eq⁻¹ and AUD 100 t CO₂-eq⁻¹—to align with ACCU price assumptions used elsewhere in the analysis. The lower price reflects recent Australian ACCU market values28, while the higher price reflects international carbon markets, such as the European Union Emissions Trading System, where prices have ranged between €60–100 29 (equivalent to approximately AUD 100–160 t CO₂-eq⁻¹).

For comparability with grazing enterprises and integration into farm partial budgets, NPVs were converted to annualised equivalents using:

- 1. Carbon sequestration

Carbon sequestration from environmental plantings was modelled using FLINTpro, producing estimates of total cumulative annual carbon sequestration. Annual incremental sequestration rates were derived by differencing cumulative per-hectare simulations over time (Fig. S4).


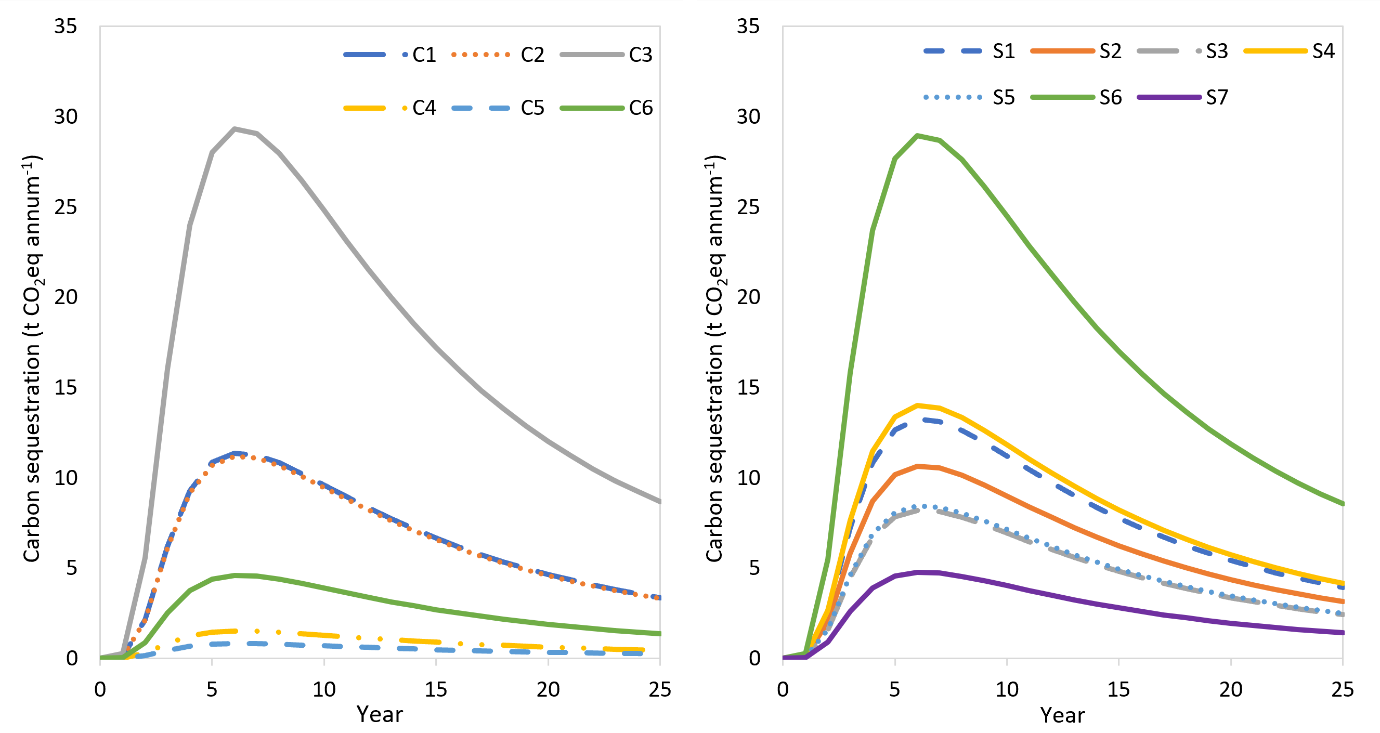


**Supplementary Methods Fig. S4. Annual carbon sequestration trajectories following native tree planting for six cattle farms (C1-6) and seven sheep farms (S1-7) distributed across Australia.** Curves depict annual carbon sequestration resulting from planting mixed native tree species, with year 0 representing the year of planting. Sequestration trajectories were implemented in FLINTpro to model spatially explicit carbon stock changes in above- and below-ground vegetation over time, capturing both growth dynamics and maturation of planted trees. These estimates were incorporated into SB-GAF to quantify net greenhouse gas mitigation alongside baseline vegetation carbon stocks, enabling evaluation of cumulative carbon abatement under farm-specific management scenarios.

- 1. Establishment costs

Costs associated with the establishment and maintenance of environmental plantings were spatially differentiated to account for location-specific factors influencing planting feasibility and cost. For example, direct seeding and mechanical tube-stock planting methods are unsuitable on steep slopes due to machinery access constraints, whereas manual tube-stock planting is more appropriate in such areas. Summers, et al. 30 developed a decision algorithm to allocate the most suitable planting method across landscapes based on biophysical and geographic variables, including slope and soil type. This approach generated spatially explicit estimates of establishment costs across Australian agricultural regions (Table S6).

All cost data were inflation-adjusted using the CPI from the Reserve Bank of Australia 22. Table S6 summarises the establishment costs applied in the economic analysis. For the three rangeland farms, it was assumed that natural regeneration would be the most likely revegetation pathway, and therefore no establishment costs were applied for these locations.

**Supplementary Methods Table S6. Costs for planting native tree species on six cattle farms (C1-6) and seven sheep farms (S1-7) distributed across Australia.** Establishment costs are shown in ascending order and were used to parameterise economic scenarios for native tree interventions. Cost data were derived from Summers, et al. 30 and include all establishment expenses. Establishment costs on C4-6 were assumed to be nil as trees in these regions regenerate naturally with exclusion of grazing. Abbreviations in brackets denote Australian States and Territories: NSW, New South Wales; NT, Northern Territory; QLD, Queensland; SA, South Australia; TAS, Tasmania, VIC, Victoria; WA, Western Australia. Costs expressed in Australian dollars (AUD).

| **Case study farm (State)** | **Cost**  **(AUD ha-1)** |
| --- | --- |
| C4 (WA) | 0.00 |
| C5 (SA) | 0.00 |
| C6 (NT) | 0.00 |
| S5 (WA) | 2,741 |
| S2 (SA) | 2,749 |
| S6 (VIC) | 2,959 |
| S7 (SA) | 2,959 |
| S3 (VIC) | 2,959 |
| S4 (NSW) | 3,052 |
| C3 (NSW) | 3,702 |
| S1 (TAS) | 4,209 |
| C2 (QLD) | 6,296 |
| C1 (QLD) | 6,788 |

**Supplementary Methods Table S7. Fencing distance and costs associated with planting native tree species on six cattle (C1-6) and seven sheep (S1-7) farms distributed across Australia.** Fencing requirements and associated costs are calculated for interventions in which 10% of the grazing area was removed from production and planted with native tree species. Rows presented in ascending order of total fencing cost. These values were used to parameterise economic scenarios for tree planting interventions. Abbreviations in brackets denote Australian States and Territories: NSW, New South Wales; NT, Northern Territory; QLD, Queensland; SA, South Australia; TAS, Tasmania; VIC, Victoria; WA, Western Australia. Costs expressed in Australian dollars (AUD).

| **Case study farm (State)** | **Distance (m)** | **Cost (AUD)** |
| --- | --- | --- |
| S4 (NSW) | 1,333 | 12,000 |
| C1 (QLD) | 4,296 | 38,664 |
| S7 (SA) | 5,899 | 53,092 |
| C3 (NSW) | 7,770 | 69,930 |
| S3 (VIC) | 12,373 | 111,353 |
| S6 (VIC) | 18,752 | 168,767 |
| C2 (QLD) | 20,367 | 183,303 |
| S1 (TAS) | 24,014 | 216,131 |
| S2 (SA) | 24,363 | 219,267 |
| S5 (WA) | 51,126 | 460,130 |
| C6 (NT) | 98,551 | 886,959 |
| C4 (WA) | 117,834 | 1,060,506 |
| C5 (SA) | 180,852 | 1,627,667 |


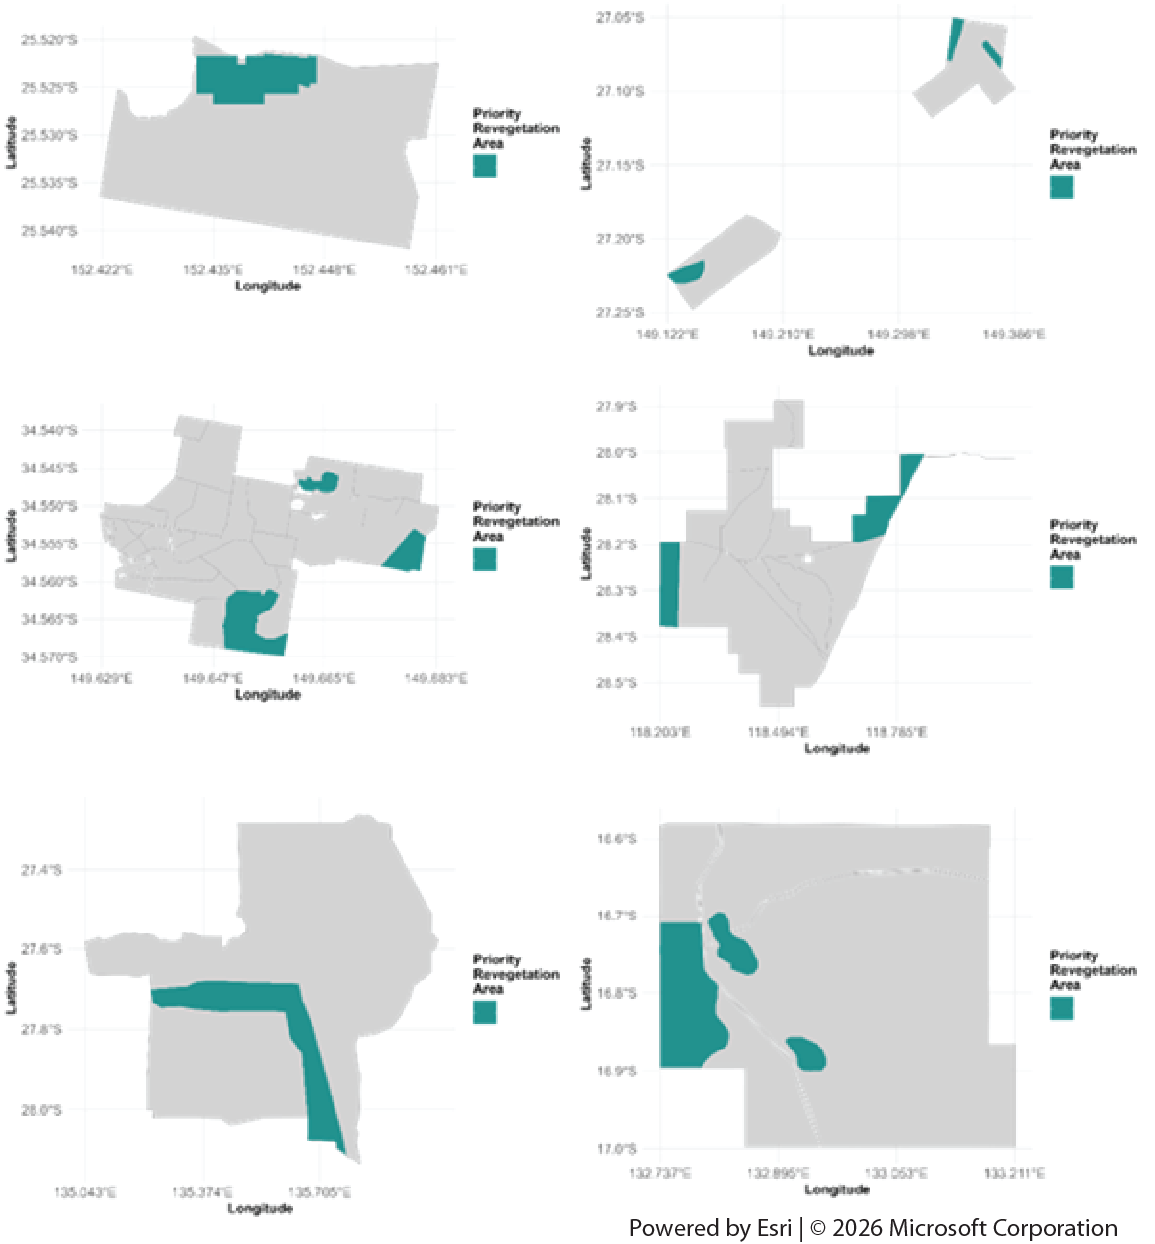


**Supplementary Methods Fig. S5. Areas prioritised by landholders for native tree planting on six cattle (C1-6) distributed across Australia.** Green-shaded areas indicate zones identified by producers as suitable for planting native trees, reflecting both ecological suitability and operational feasibility. Images are organised by farm: C1 (QLD, top left), C2 (QLD, top right), C3 (NSW, middle left), C4 (WA, middle right), C5 (SA, bottom left), C6 (NT, bottom right). These prioritised areas informed spatial allocation of tree planting interventions in the modelling framework. Abbreviations in brackets denote Australian States and Territories: NSW, New South Wales; NT, Northern Territory; QLD, Queensland; SA, South Australia; TAS, Tasmania; VIC, Victoria; WA, Western Australia. Map created in R (v4.2) using the tmap package31. Basemap imagery courtesy of Esri (World Light Gray Reference) and Microsoft Bing Maps Aerial Imagery. Microsoft product screen shot(s) reprinted with permission from Microsoft Corporation. Esri data sources: Esri, Airbus DS, USGS, NGA, NASA, and the GIS user community.

- 1. Fencing costs associated with planting native tree species

Fencing was treated as a variable establishment cost associated with the implementation of native tree planting for carbon sequestration. Priority revegetation areas were identified in consultation with individual landholders (Figs. S6 and S7) and used to define plausible spatial configurations for each revegetation project. Based on these configurations, the total length of fencing required (linear metres) was estimated for each property (Table S7).

It was assumed that no existing fencing was present within the designated revegetation areas and that all fencing would therefore be newly constructed. Some revegetation layouts, particularly those implemented on sheep farm S5 (Fig. S6), involved complex spatial arrangements, which resulted in greater total fence length and higher overall fencing costs.

Following consultation with fencing contractors, a range of fencing costs (AUD 9–13 m⁻¹) was evaluated. The lower bound of this range (AUD 9 m⁻¹) was treated as the most likely value and was applied consistently across all case study farms in the economic analysis (Table S7).


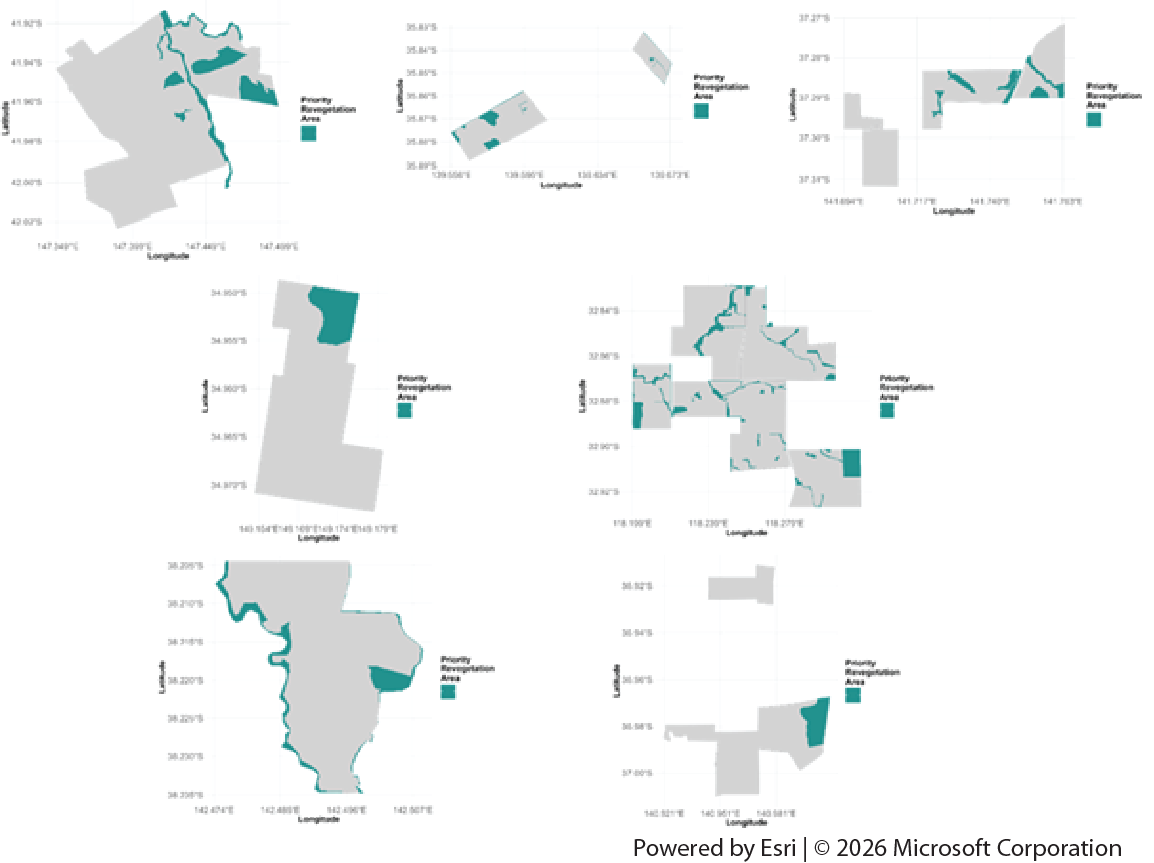


**Supplementary Methods Fig. S6. Areas prioritised by landholders for native tree planting on seven sheep farms (S1-7) distributed across Australia.** Green-shaded areas indicate zones identified by producers as suitable for planting native trees, reflecting both ecological suitability and operational feasibility. Images arranged by farm: S1 (TAS, top left), S2 (SA, top middle), S3 (VIC, top right), S4 (NSW, middle left), S5 (WA, middle right), S6 (VIC, bottom left), S7 (SA, bottom right). These prioritised areas informed spatial allocation of tree planting interventions in the modelling framework. Abbreviations in brackets denote Australian States and Territories: NSW, New South Wales; NT, Northern Territory; QLD, Queensland; SA, South Australia; TAS, Tasmania; VIC, Victoria; WA, Western Australia. Map created in R (v4.*2*) using the tmap package*31*. Basemap imagery courtesy of Esri (World Light Gray Reference) and Microsoft Bing Maps Aerial Imagery. Microsoft product screen shot(s) reprinted with permission from Microsoft Corporation. Esri data sources: Esri, Airbus DS, USGS, NGA, NASA, and the GIS user community.

- 1. Maintenance costs

Maintenance costs were defined as ongoing costs associated with routine management and upkeep of planted areas over the project lifetime. These included, but were not limited to, fence repairs, post-planting watering, and weed and pest control. Estimates from plantation forestry studies 32,33 indicate annual maintenance costs in the order of AUD 80–100 ha⁻¹ yr⁻¹. To reflect a conservative assumption consistent with previous sections, the upper bound of this range (AUD 100 ha⁻¹ yr⁻¹) was applied in this analysis.

- 1. Risk of reversal buffer and permanence discount

A risk of reversal buffer is a discount applied to ACCUs issued on sequestration projects. The buffer is designed to protect the ACCU Scheme against potential loss of carbon from risks that cannot be managed by other permanence arrangements. It applies a 5% discount to all ACCUs accrued by a project (https://cer.gov.au/schemes/australian-carbon-credit-unit-scheme/how-to-participate-accu-scheme/permanence-obligations). The permanence period discount applies to sequestration projects including environmental plantings. For projects electing a permanence period of 25 years, a further discount of 20% is applied to ACCUs accrued by the project34. Both discounts were applied consistently across all carbon sequestration analyses described in Section 3.5.

- 1. Discount rate

Previous studies have demonstrated substantial variation in real discount rates (*r*) used for woodland valuation in Australia and New Zealand, ranging from 5% to 14%35,36. Ferguson 36 found that a real discount rate of 7.4% was appropriate for deterministic economic analyses of forestry investments. Consistent with this literature 19,20, a real discount rate of 7.5% was adopted for all discounted cash flow analyses in this study.

- 1. Annualised equivalent profit

Annualised equivalent profits were derived from the discounted cash flow analysis described above. Brokerage fees were assumed to be zero. Results were calculated for two carbon price scenarios: AUD 38 t CO₂eq⁻¹ (low ACCU price) and AUD 100 t CO₂eq⁻¹ (high ACCU price), consistent with carbon price assumptions applied elsewhere in the economic analysis.

As the resulting values were expressed on a per-hectare basis, annualised equivalent profits were multiplied by the total area removed from grazing on each farm to estimate annualised whole-farm profit impacts (Table S8).

- 1. Biodiversity income

Market prices for biodiversity remain limited due to the inherent challenges of economically quantifying ecological values 37. In this analysis, biodiversity was assumed to be valued as a co-benefit of carbon sequestration. Low and high price scenarios of AUD 29 t CO₂ eq⁻¹ and AUD 65 t CO₂ eq⁻¹, respectively, were applied, based on the Carbon Neutral Biodiverse Reforestation Carbon Offsets framework 38. When combined with ACCU prices (Section 3.5), this resulted in a combined low ACCU price of AUD 67 t CO₂ eq⁻¹ and a high ACCU price of AUD 165 t CO₂ eq⁻¹ for both the 10% tree planting intervention and the farm-specific intervention for S1 (TAS), where 100 ha of grazing land were removed by fencing paddocks adjacent to rivers.

- 1. Costs for riparian fencing on S1 (TAS) and C2 (QLD)

To support natural regeneration of native trees and shrubs, grazing land adjacent to riverbanks (S1, TAS) and creeks (C2, QLD) was removed from production.

For S1 (TAS), fencing costs were estimated as follows:

- Fencing 4 km of riverbank: AUD 20,000 km⁻¹, with a lifespan of 30 years, equivalent to AUD 4,500 yr⁻¹ (i.e., 150 m at AUD 20 m⁻¹).
- Fencing 4 km of riverbank plus 9 km of boundary fence adjacent to native vegetation (total 13 km): AUD 10,000 yr⁻¹ (i.e., 500 m at AUD 20 m⁻¹ including maintenance).

This higher cost accounts for the use of game-proof fencing along 9 km of boundary, reflecting the 100 ha area removed from grazing. For C2 (QLD), areas removed from grazing consisted of pre-existing paddocks; no additional fencing was required. These costs were incorporated into farm budgets to align with other tree planting interventions (Sections 3.6–3.10) and enable consistent estimation of net farm profitability under land-use change scenarios.

**Supplementary Methods Table S8. Annual profit per hectare associated with planting native tree species on six cattle (C1-6) and seven sheep farms (S1-7) distributed across Australia.** Values represent long-term average economic outcomes when implementing tree planting on 10% of the grazing land, excluding the opportunity cost associated with reduced stock numbers. Bold results highlight scenarios in which net profit in establishing and maintaining tree planting remains profitable, demonstrating potential co-benefits of carbon and biodiversity-focused interventions. Case study farms are listed in ascending order of profit for comparative purposes. Abbreviations in brackets denote Australian States and Territories: NSW, New South Wales; NT, Northern Territory; QLD, Queensland; SA, South Australia; TAS, Tasmania; VIC, Victoria; WA, Western Australia. Costs expressed in Australian dollars (AUD).

| **Case study farm (State)** | **Carbon price**  **(AUD t CO2eq-1)** | **Annual profit (AUD ha yr-1)** |
| --- | --- | --- |
| C1 (QLD) | 38 | -905 |
|  | 100 | -597 |
| C2 (QLD) | 38 | -497 |
|  | 100 | -175 |
| C3 (NSW) | 38 | -10 |
|  | **100** | **831** |
| C4 (WA) | 38 | -81 |
|  | **100** | -37 |
| C5 (SA) | 38 | -88 |
|  | 100 | -65 |
| C6 (NT) | 38 | -23 |
|  | **100** | **109** |
| S1 (TAS) | 38 | -368 |
|  | **100** | **13** |
| S2 (SA) | 38 | -419 |
|  | 100 | -114 |
| S3 (VIC) | 38 | -403 |
|  | 100 | -167 |
| S4 (NSW) | 38 | -243 |
|  | **100** | **156** |
| S5 (WA) | 38 | -308 |
|  | 100 | -65 |
| S6 (VIC) | 38 | -201 |
|  | **100** | **629** |
| S7 (SA) | 38 | -309 |
|  | 100 | -172 |

1. Demand-driven interventions
   1. Impacts of pasture production on soil organic carbon (SOC) sequestration

Spatially explicit FLINTpro simulations were used to quantify relationships between annual pasture production and SOC flux for each farm. These relationships were applied to estimate effects of interventions on SOC sequestration (Table S9). For conservatism, only interventions altering annual pasture production by ≥ ±5% relative to baseline were assumed to influence SOC flux; changes < 5% were considered *de minimis*.

As with tree planting interventions (Sections 3.5–3.12), any scenario exceeding ±5% SOC flux was assumed to incur a corresponding effect on farm profitability. In cases where SOC increased, a 5% risk-of-reversal buffer and a 20% permanence discount were applied, consistent with the ACCU Scheme for SOC projects. A 7.5% discount rate 39 was used to convert future benefits to annualised net present value (NPV). Costs associated with SOC losses were quantified as carbon taxes, calculated as the reduction in SOC stocks (t C ha⁻¹ yr⁻¹) multiplied by the applicable low or high ACCU price.

**Supplementary Methods Table S9. Soil organic carbon flux (SOC; t CO₂ eq ha⁻¹ yr⁻¹) associated with interventions perturbing annual pasture production by ≥ ± 5% relative to baseline pasture production on six cattle (C1-6) and seven sheep (S1-7) farms distributed across Australia.** Values represent long-term annualised changes in SOC simulated by RothC (v26.5) within FLINTpro or SGS (for farm C3 [NSW]) in response to interventions. Only interventions resulting in ≥ ± 5% change in pasture productivity relative to baseline were included to capture ecologically and economically meaningful SOC responses. Fluxes were incorporated into net farm greenhouse gas emissions estimates via SB-GAF Abbreviations in brackets denote Australian States and Territories: NSW, New South Wales; NT, Northern Territory; QLD, Queensland; SA, South Australia; TAS, Tasmania; VIC, Victoria; WA, Western Australia.

|  | **Soil organic carbon flux (t CO2eq ha-1 yr-1)** | | | | |
| --- | --- | --- | --- | --- | --- |
| **Change in pasture production** | **-10%** | **-5%** | **+5%** | **+10%** | **+15%** |
| C1 (QLD) | -0.99 | -0.53 | 0.62 | 1.36 | 2.25 |
| C2 (QLD) | -0.52 | -0.28 | 0.33 | 0.72 | 1.19 |
| C3 (NSW) | -0.67 | -0.36 | 0.42 | 0.92 | 1.51 |
| C4 (WA) | -0.27 | -0.14 | 0.17 | 0.37 | 0.61 |
| C5 (SA) | -0.16 | -0.09 | 0.10 | 0.23 | 0.37 |
| C6 (NT) | -0.36 | -0.19 | 0.22 | 0.49 | 0.81 |
| S1 (TAS) | -0.54 | -0.29 | 0.34 | 0.73 | 1.21 |
| S2 (SA) | -0.68 | -0.37 | 0.43 | 0.94 | 1.55 |
| S3 (VIC) | -0.69 | -0.37 | 0.43 | 0.95 | 1.57 |
| S4 (NSW) | -0.66 | -0.36 | 0.42 | 0.91 | 1.51 |
| S5 (WA) | -0.62 | -0.33 | 0.39 | 0.85 | 1.40 |
| S6 (VIC) | -0.74 | -0.39 | 0.46 | 1.01 | 1.67 |
| S7 (SA) | -0.82 | -0.44 | 0.51 | 1.12 | 1.85 |

- 1. Replacing mono-ammonium phosphate with green waste compost on S6 (VIC)

Farm S6 (VIC) applied 32 t MAP yr⁻¹ under the baseline system. One intervention replaced this synthetic phosphorus with organic compost applied at equivalent nutrient rates, while assigning an economic value to other nutrients supplied by the compost (e.g., potassium). Purchase and application costs, obtained from the supplier, increased fertiliser expenditure by AUD 19,420 yr⁻¹ relative to baseline (Table S10).

To capture pasture growth effects, the GrassGro fertility scalar was increased by 4%, yielding a 3% increase in pasture production40. The resulting change in net GHG emissions—an additional 30.63 t CO₂ eq yr⁻¹—was incorporated into the SB-GAF–derived net farm GHG emissions (Table S11).

**Supplementary Methods Table S10. Annual costs associated with replacing mono-ammonium phosphate (MAP, baseline) with green waste compost and additional potassium supplied via compost to substitute for muriate of potash applications.** This farm-specific, demand-driven intervention was applied exclusively to case study sheep farm S6 (VIC) to reflect site-specific nutrient management strategies. Costs incorporate purchase, transport, application, and incorporation of compost, including transport assumptions of AUD 21.50 t⁻¹ plus AUD 1.50 km⁻¹ for a 160 km return trip from the supplier. No external cost was applied for spreading MAP in the baseline, as this was performed by the farmer. Long-term potassium requirements were included based on national fertiliser demand projections 41. Annualised costs were incorporated into enterprise profitability assessments to enable comparison with baseline fertiliser expenditures and evaluate the financial implications of nutrient management interventions. Abbreviations: AUD, Australian dollars; GHG, greenhouse gas; MAP, mono-ammonium phosphate fertiliser; S, sheep; VIC, Victoria; WM = wet mass.

| Baseline  (MAP fertiliser) | Fertiliser applied (tonnes) | 32 |
| --- | --- | --- |
| Cost of fertiliser (AUD tonne-1) | 1,450 |
| Spreading costs (AUD hectare-1) | 0 |
| Total cost inorganic fertiliser (AUD yr-1) | 46,400 |
| Compost | Compost applied (tonnes WM) | 1,760 |
| Cost of compost (AUD tonne-1) | 18.25 |
| Compost total cost (AUD yr-1) | 32,120 |
| Transport product (AUD tonne-1) | 21.64 |
| Total transport cost (AUD yr-1) | 38,080 |
| Total cost compost (AUD yr-1) | 70,000 |
| Spreading cost (AUD tonne-1) | 12.50 |
| Total spreading cost (AUD yr-1) | 22,000 |
| Total cost of compost (AUD yr-1) | 92,000 |
| Additional potassium supplied with compost  (replacement for muriate of potash) | Potassium fertiliser requirements (kg ha-1) | 70 |
| Hectares yr-1 fertiliser applied | 440 |
| Savings in potassium (tonne yr-1) | 30.8 |
| Potassium cost (AUD tonne fertiliser-1) | 850 |
| Cost saving in potassium (AUD yr-1) | 21,180 |
| Cost of compost less additional nutrient supplied (AUD yr-1) | | 65,820 |
| Cost of compost above that of MAP fertiliser (AUD yr-1) | | 19,420 |

**Supplementary Methods Table S11. Greenhouse gas emissions associated with replacing mono-ammonium phosphate (MAP) fertiliser with green waste compost.** This farm-specific, demand-driven intervention was applied exclusively to case study sheep farm S6 (Victoria) to reflect site-specific nutrient management strategies. Emissions are expressed in t CO₂eq per hectare per yr and include Scope 1, 2, and embedded emissions associated with production, transport, and application. GWP denotes global warming potential using 100-year time horizon (GWP₁₀₀) as per IPCC AR5. MAP refers to the baseline mono-ammonium phosphate fertiliser, while the compost intervention replaces MAP with green waste compost and additional potassium to maintain equivalent nutrient supply. Values were used to parameterise demand-driven intervention scenarios applied to relevant case study farm.

|  |  | **MAP** | **Compost** |
| --- | --- | --- | --- |
| Direct N2O | Emission factor (Gg N2O-N Gg N-1) | 0.002 a | 0.0001b |
| Conversion factor (elemental N to molecular N) | 1.57 a | 1.57 a |
| GWP N2O | 265 a | 265 a |
| Rate of N applied (t) | 3.2 | 17.62 |
| Total t CO2eq | 2.67 | 0.73 |
| Indirect N2O through volatilisation | Emission factor (Gg NH3-N Gg N-1) | 0.11 a | 0.033 b |
| Conversion factor (elemental N to molecular N) | 1.57 a | 1.57 a |
| GWP N2O | 265 a | 265 a |
| Rate of N applied (t) | 3.2 | 17.62 |
| Total t CO2eq | 0.29 | 0.02 |
| Indirect N2O through leaching | Emission factor (Gg NO3-N Gg N applied-1) | 0.24 a | 0.027 b |
| Emission factor (Gg N-Gg N-1) | 0.011 a | 0.011 a |
| Conversion factor (elemental N to molecular N) | 1.57 a | 1.57 a |
| GWP N2O | 265 a | 265 a |
| Rate of N applied (t) | 3.2 | 17.62 |
| Total t CO2eq | 3.52 | 2.18 |
| Scope 3 | Emission factor for Scope 1 at production (t CO2eq t product-1) | 0.7 c | 0.046 d |
| Total product (t) | 32 | 1,232 |
| Total t CO2eq | 22.5 | 56.67 |
| Total CO2eq |  | 28.97 | 59.61 |
| Additional GHG with compost (t CO2eq) | |  | 30.63 |

a Australian Government Department of Climate Change 42; b Nicholson, et al. 43; c As per Scope 3 emissions for MAP fertiliser in SB-GAF; d Australian Department of Climate Change, Energy, the Environment and Water 44

- 1. Impacts of enhanced liveweight gain of non-replacement animals on avoided methane

Effects of increasing daily liveweight gain (LWG) for juvenile stock on farm productivity and GHG emissions were quantified by modelling reductions in days on farm. Baseline daily LWG (kg day-1) for each cohort of young stock (i.e., steers and heifers for cattle farms and wethers and ewes for the sheep farms), based on birth liveweight of 40 kg head-1 for the cattle farms and 3 kg head-1 for the sheep farms, was calculated as:

Two scenarios of LWG improvement were considered: 10% increase and 50% increase. Accordingly, scenario-specific daily LWG values were generated by multiplying baseline LWG by 1.1 or 1.5 (i.e. Liveweight gain multiplier in Table S12 for the 50% increase scenario), while holding the target sale weight constant to that of the baseline system. The number of days required to reach sale weight was recalculated, representing days on farm avoided and the amount of CH4 avoided was deducted from net farm GHG emissions.

In SB-GAF, the reduction in enteric CH₄ emissions was calculated as:

To achieve a 50% LWG increase, steers and heifers required an additional 4.847 MJ of metabolisable energy (ME) per 100 g of LWG above the baseline daily LWG. This value represents the median ME requirement for 500 g LWG, scaled to 100 g, derived from CSIRO’s CattleExplorer spreadsheet45, which underpins GrassGro feeding algorithms.

The economic cost of supplementation was calculated as:

with ME priced at AUD 0.034 MJ⁻¹ based on an average grain–forage blend costing AUD 376 t DM⁻¹ supplying 11.3 MJ ME kg DM⁻¹. Consequently, the daily cost of 100 g additional LWG per head was AUD 0.166. This process was repeated for wether and ewe lambs for the seven sheep farms, based on the same ME requirements per 100 g LWG as per the cattle farms, based on CSIRO’s SheepExplorer spreadsheet.

For the example farm C2 (QLD) shown here, intervention steers and heifers gained an extra 0.38 and 0.33 kg head⁻¹ day⁻¹ above baseline, requiring supplementation for 280 and 288 days between birth and the revised sale date (Table S12). The total annual cost of additional LWG was estimated at AUD 62,578 yr⁻¹ (Table S13), while the associated reduction in enteric CH₄ was valued at AUD 19,220 yr⁻¹ when based on a carbon price of AUD 100 t CO2eq-1.

This framework captures the trade-off between productivity gains and supplementary feeding costs, demonstrating that enhanced growth rates can deliver both reduced GHG emissions and earlier market readiness, although the financial value of emissions abatement is lower than the cost of feed supplementation. Seasonal management constraints, such as tropical wet-season transport limitations, were not explicitly modelled. However, most scenarios with 50% LWG resulted in animals reaching sale weight during summer months, making the projected GHG reductions achievable under standard farm operations.

**Supplementary Methods Table S12. Data used to parameterise enteric methane (CH₄) avoidance associated with 50% liveweight gain intervention, using cattle case study farm C2 (QLD) as an example.** Data include baseline and intervention-specific livestock parameters used in biophysical model simulations (GrassGro, SB-GAF). The intervention combined improved grazing management, genetic selection, and supplementary feeding to achieve a 50% increase in liveweight gain relative to baseline, applied from birth to sale for non-replacement cattle. Values are used to parameterise demand-driven interventions and evaluate trade-offs across productivity, emissions, and profitability. Abbreviations: C, cattle; LW, liveweight; CH₄, enteric methane; EI, emissions intensity; SB-GAF, Sheep & Beef Greenhouse Gas Accounting Framework.

| **Variable** | **Steers** | **Heifers** |
| --- | --- | --- |
| Birth date | 11 July 2023 | 11 July 2023 |
| Sale date (baseline) | 3 September 2024 | 3 September 2024 |
| Days on farm (baseline) | 420 | 432 |
| Liveweight gain (kg) | 323 | 289 |
| Liveweight gain: baseline (kg day-1) | 0.77 | 0.67 |
| Liveweight gain multiplier | 1.5 | 1.5 |
| Liveweight gain: intervention (kg day-1) | 1.15 | 1.00 |
| Days on farm: intervention | 280 | 288 |
| Methane production (kg CH4 day-1 head-1) | 0.14 | 0.12 |
| Methane saved (kg CH4 head-1) | 19 | 18 |
| Number of head sold | 213 | 156 |
| Methane saved (t CO2e stock class-1) | 114 | 78 |

**Supplementary Methods Table S13. Data used to determine energetic and economic requirements for achieving a 50% increase in daily liveweight gain for juvenile cattle, using case study farm C2 (QLD) as an example.** The intervention combines improved grazing management, supplementary feeding, and/or genetic selection. Costs include feed inputs necessary to support enhanced LWG. Metabolisable energy is expressed in MJ head⁻¹ day⁻¹ to quantify dietary contributions to growth and inform the economic assessment. Annualised costs were incorporated into enterprise profitability analyses to evaluate trade-offs between productivity gains, enteric CH₄ emissions, and financial outcomes under low- and high-price scenarios. Abbreviations: AUD, Australian dollars; C, cattle; LWG, liveweight gain; ME, metabolisable energy; MJ, megajoules; QLD, Queensland.

| **Variable** | **Steers** | **Heifers** |
| --- | --- | --- |
| Difference in LWG with intervention (g day-1) | 384 | 334 |
| Additional ME required (MJ ME head-1 day-1) | 56 | 49 |
| Number of days on farm | 280 | 288 |
| Additional ME required to sale date (MJ ME head-1) | 5,224 | 4,664 |
| Cost of additional supplement (AUD head-1) | 178 | 159 |
| Total cost for each stock class (AUD) | 37,782 | 24,795 |

1. References

1 Donnelly, J. R., Moore, A. D. & Freer, M. GRAZPLAN: Decision support systems for Australian grazing enterprises .1. Overview of the GRAZPLAN project, and a description of the MetAccess and LambAlive DSS. *Agric. Syst.* **54**, 57–76 (1997). <https://doi.org/10.1016/S0308-521x(96)00046-7>

2 Moore, A. D., Donnelly, J. R. & Freer, M. GRAZPLAN: Decision support systems for Australian grazing enterprises .3. Pasture growth and soil moisture submodels, and the GrassGro DSS. *Agric. Syst.* **55**, 535–582 (1997). <https://doi.org/10.1016/S0308-521x(97)00023-1>

3 Liedloff, A. C. *et al.* Crop Livestock Enterprise Model (CLEM) User guide and reference manual. (APSIM Initiative and CSIRO, 2024).

4 Johnson, I. R., Lodge, G. M. & White, R. E. The Sustainable Grazing Systems Pasture Model: description, philosophy and application to the SGS National Experiment. *Aust. J. Exp. Agric.* **43**, 711 (2003). <https://doi.org/10.1071/ea02213>

5 Browne, N. A., Bray, S. G., Johnson, I. R., O'Reagain, P. J. & Eckard, R. J. Northern Australian pasture and beef systems. 2. Validation and use of the Sustainable Grazing Systems (SGS) whole-farm biophysical model. *Anim. Prod. Sci.* **54**, 1995 (2014). <https://doi.org/10.1071/an14569>

6 Browne, N. A., Behrendt, R., Kingwell, R. S. & Eckard, R. J. Does producing more product over a lifetime reduce greenhouse gas emissions and increase profitability in dairy and wool enterprises? *Anim. Prod. Sci.* **55**, 49 (2015). <https://doi.org/10.1071/an13188>

7 Bell, M. J., Eckard, R. J. & Cullen, B. R. The effect of future climate scenarios on the balance between productivity and greenhouse gas emissions from sheep grazing systems. *Livest. Sci.* **147** (2012). <https://doi.org/10.1016/j.livsci.2012.04.012>

8 FLINTpro. *FLINTpro: Australia Statistical Areas - Forest/Non-Forest T3 V2*, <<https://www.flintpro.com/>> (2022).

9 CSIRO. *LOOC-B: Landscape Options and Opportunities Calculator - for Biodiversity*, <<https://looc-b.farm/>> (2024).

10 Coleman, K. & Jenkinson, D. S. RothC-A model for the turnover of carbon in soil Model description and users guide (Windows version). (2014).

11 Department of Science, Information Technology and Innovation. AussieGRASS Environmental Calculator: User guide (Version 1.5). (State of Queensland, 2015).

12 Lopez, M. B., Dunn, J., Wiedemann, S. & Eckard, R. *A Greenhouse Accounting Framework for Beef and Sheep properties based on the Australian National Greenhouse Gas Inventory methodology*, <<http://piccc.org.au/Tools>> (2023).

13 Baldock, J. *et al.* Australian Soil Carbon Research Program (SCaRP) Dataset. (2013). <https://doi.org/10.25919/5ddfd6888d4e5>

14 Jeffrey, S. J., Carter, J. O., Moodie, K. B. & Beswick, A. R. Using spatial interpolation to construct a comprehensive archive of Australian climate data. *Environ. Model. Softw.* **16**, 309–330 (2001). <https://doi.org/10.1016/S1364-8152(01)00008-1>

15 Hutchinson, M., Kesteven, J. & Xu, T. in *NCI Australia & Terrestrial Ecosystem Research Network (TERN) Data Discovery Portal* (2016).

16 McLennan, S., McLean, I. & Paton, C. Re-defining the animal unit equivalence (AE) for grazing ruminants and its application for determining forage intake, with particular relevance to the northern Australian grazing industries. (Meat & Livestock Australia, North Sydney, NSW, Australia, 2020).

17 FutureBeef. *Saltbush: A grazing option?*, <<https://futurebeef.com.au/resources/saltbush-a-grazing-option/>> (2023).

18 Rickert K.G., Stuth J.W. & McKeon G.M. Modelling pasture and animal production. *Field and laboratory methods for grassland and animal production research*, 29–66 (2000).

19 Scanlan, J. C., Whish, G. L., Pahl, L. I., Cowley, R. A. & MacLeod, N. D. in *19th International Congress on Modelling and Simulation (Modsim2011)* (ed J. Wongsosaputro, Pauwels, L.L. and Chan, F.) 877–883 (2011).

20 Meat and Livestock Australia. *MLA Statistics*, <<https://www.mla.com.au/prices-markets/statistics/>> (2023).

21 Australian Wool Innovation & Meat and Livestock Australia. *Making More From Sheep Chapter 3.2 Manage the production system to meet market specifications*, <<https://www.makingmorefromsheep.com.au/manual/module-3-market-focused-lamb-and-sheepmeat-production/chapter-3-2-manage-the-production-system-to-meet-market-specifications/>> (2024).

22 Reserve Bank of Australia. *Consumer Price Inflation*, <<https://www.rba.gov.au/inflation/measures-cpi.html>> (2024).

23 Australian Wool Exchange. *AWEX wool market indicators*, <<https://www.awex.com.au/market-information/awex-wool-market-indicators/>> (

24 Australian Wool Innovation. *Weekly market reports*, <<https://www.wool.com/market-intelligence/weekly-price-reports/>> (2023).

25 Elgin, B. *Why won’t companies use this quick fix to reduce cow CH4 emissions?*, <<https://www.bloomberg.com/news/features/2023-06-28/this-quick-fix-reduces-methane-emissions-from-cow-burps>> (2023).

26 Stringleman, H. *Australia banks on CH4 inhibition products*, <<https://www.farmersweekly.co.nz/technology/australia-is-banking-on-methane-inhibition-products/>> (2022).

27 Clean Energy Regulator. *Australian Carbon Credit Unit (ACCU) Scheme*, <<https://cer.gov.au/schemes/australian-carbon-credit-unit-scheme>> (2023).

28 Clean Energy Regulator. *Quarterly carbon market report: June quarter 2023*, <<https://cer.gov.au/markets/reports-and-data/quarterly-carbon-market-reports/quarterly-carbon-market-report-june-quarter-2023/australian-carbon-credit-units-accus>> (2024).

29 EMBER. *Carbon Price Tracker*, <<https://ember-climate.org/data/data-tools/carbon-price-viewer/>> (2024).

30 Summers, D. M., Bryan, B. A., Nolan, M. & Hobbs, T. J. The costs of reforestation: a spatial model of the costs of establishing environmental and carbon plantings. *Land Use Policy* **44**, 110–121 (2015). <https://doi.org/10.1016/j.landusepol.2014.12.002>

31 Tennekes, M. tmap: Thematic Maps in R. *Journal of Statistical Software* **84**, 1–39 (2018).

32 Regan, C. M., Connor, J. D. & Iftekhar, M. S. An economic assessment of options for operating within plantation forestry water entitlements and tightening cap and trade policy. *Aust. J. Agric. Resour. Econ.,* **67**, 303–322 (2023). <https://doi.org/10.1111/1467-8489.12508>

33 Regan, C. M. & Connor, J. D. Unlocking opportunities for plantation forestry expansion in the Green Triangle – the role of the emissions reduction fund., (University of South Australia, Adelaide, 2022).

34 Clean Energy Regulator. *Understanding your plantation forestry project*, <<https://www.cleanenergyregulator.gov.au/ERF/Choosing-a-project-type/Opportunities-for-the-land-sector/Vegetation-methods/plantation-forestry-method>> (2022).

35 Manley, B. Discount rates used for forest valuation–results of the 2015 survey. *NZ Journal of Forestry* **61**, 29 (2016).

36 Ferguson, I. Discount rates for corporate forest valuations. *Aust. For.* **81**, 142–147 (2018).

37 PricewaterhouseCoopers. A nature-positive Australia: The value of an Australian biodiversity market. (2022).

38 Carbon Neutral. *Biodiverse Reforestation: Putting a value on co-benefits- Yarra Yarra Biodiversity Corridor*, <<https://carbonneutral.com.au/co-benefits-blog/>> (2022).

39 Thamo, T., Pannell, D. J., Kragt, M. E., Robertson, M. J. & Polyakov, M. Dynamics and the economics of carbon sequestration: common oversights and their implications. *Mitig. Adapt. Strateg. Glob. Chang.,* **22**, 1095–1111 (2017). <https://doi.org/10.1007/s11027-016-9716-x>

40 Leech, F. J. *et al.* Comparative effect of alternative fertilisers on pasture production, soil properties and soil microbial community structure. *Crop Pasture Sci.* **70**, 1110–1127 (2019). <https://doi.org/10.1071/Cp19018>

41 Australian Trade and Investment Commission. *News and analysis*, <<https://www.austrade.gov.au/en/news-and-analysis/analysis>> (2023).

42 Australian Government Department of Climate Change, Energy, the Environment and Water. *The Australian Government Submission to the United Nations Framework Convention on Climate Change - Australian National Greenhouse Accounts National Inventory Report*, <<https://www.dcceew.gov.au/climate-change/publications/national-inventory-reports>> (2023).

43 Nicholson, F. *et al.* Nitrogen losses to the environment following food-based digestate and compost applications to agricultural land. *Environ. Pollut.* **228**, 504–516 (2017). <https://doi.org/10.1016/j.envpol.2017.05.023>

44 Australian Government Department of Climate Change, Energy, the Environment and Water. *Australian National Greenhouse Accounts Factors- for individuals and organisations estimating greenhouse gas emissions*, <<https://www.dcceew.gov.au/sites/default/files/documents/national-greenhouse-accounts-factors-2022.pdf>> (2023).

45 CSIRO. *Useful links and downloads*, <<https://grazplan.csiro.au/useful-links/>> (2023).
